# A fungal pathogen that robustly manipulates the behavior of *Drosophila melanogaster* in the laboratory

Carolyn Elya<sup>1\*</sup>, Tin Ching Lok<sup>1#</sup>, Quinn E. Spencer<sup>1#</sup>, Hayley McCausland<sup>1</sup>, Michael B. Eisen<sup>1,2,3\*</sup>

<sup>1</sup> Department of Molecular and Cell Biology, University of California, Berkeley, CA

<sup>2</sup> Department of Integrative Biology, University of California, Berkeley, CA

<sup>3</sup> Howard Hughes Medical Institute, University of California, Berkeley, CA

\* Correspondence: [cnelya@gmail.com](mailto:cnelya@gmail.com), [mbeisen@berkeley.edu](mailto:mbeisen@berkeley.edu)

# These authors contributed equally to this publication

## Abstract

Many microbes induce striking behavioral changes in their animal hosts, but how they achieve these effects is poorly understood, especially at the molecular level. This is due in large part to the lack of a robust system amenable to modern molecular manipulation. We recently discovered a strain of the behavior-manipulating fungal fly pathogen *Entomophthora muscae* infecting wild adult *Drosophila* in Northern California, and developed methods to reliably propagate the infection in lab.-reared *Drosophila melanogaster*. Our lab.-infected flies manifest the moribund behaviors characteristic of *E. muscae* infections: on their final day of life they climb to a high location, extend their proboscides and become affixed to the substrate, then finally raise their wings to strike a characteristic death pose that clears a path for spores that are forcibly ejected from their abdomen to land on and infect other flies. Using a combination of descriptive, histological, molecular and genomic techniques, we have carefully characterized the progress of infection in lab.-reared flies in both the fungus and host. Enticingly, we reveal that *E. muscae* invades the fly nervous system early in infection, suggesting a direct means by which the fungus could induce behavioral changes. Given the vast toolkit of molecular and neurobiological tools available for *D. melanogaster*, we believe this newly established *E. muscae* system will permit rapid progress in understanding how microbes manipulate animal behavior.

## Introduction

Among the most extraordinary products of evolution are microorganisms that are able to manipulate animal behavior to their advantage. Some have achieved fame in the popular press, like the fungus *Ophiocordyceps*

*unilateralis* that makes ants wander away from their nests and climb to an optimal height before sprouting through their heads to rain down infectious spores [1], or the protozoan *Toxoplasma gondii* that suppresses rodents' innate fear of cat odors to aid the return of the parasite to a cat's stomach where it can sexually reproduce [2]. However, the mechanisms by which these and other microbes hijack the animal nervous system have remained elusive.

*Entomophthora*, from the Greek meaning "insect destroyer", is an aptly-named genus within the basal fungal lineage Zoopagomycota consisting of species that infect, alter the behavior of, then kill their insect hosts [3]. *Entomophthora muscae*, first described in 1855 [4] in house flies (*Musca domestica*), is a fungal species complex that exclusively targets dipterans [5,6]. A fly infected with *E. muscae* exhibits a striking set of behaviors: shortly before sunset on its final day of life, the fly climbs to a high location (a behavior known as "summiting"), extends its proboscis and becomes affixed to the substrate on which it stands via fungal holdfasts [7–9]. The fly's wings then lift up and away from its dorsal abdomen, striking a final death pose that is thought to be ideal for fungal dispersal [9].

Over the course of the next few hours, the fungus within the dead fly differentiates into structures called conidiophores that emerge through the weakest points in the fly's cuticle, usually the intersegmental membranes of the dorsal abdomen, giving the cadavers a distinct banding pattern [10]. A primary conidium (also referred to as a "spore") forms at the tip of each conidiophore; once mature, these conidia are forcibly ejected into the surrounding environment in order to land on the cuticle of a susceptible fly host [11,12].

Launched primary conidia are polynucleated, campanulate (bell-shaped) and are surrounded by a sticky "halo" that serves to adhere the conidium where it lands. If successful in landing on the cuticle of a new host, the conidium germinates, using both mechanical and enzymatic force to bore through the cuticle and into the fly's hemolymph [10,13]. If the primary conidium misses its target or fails to germinate upon landing on the host [14], it can sporulate anew to generate a smaller secondary conidium [11]. Off-target conidia can continue to re-sporulate and give rise to smaller, higher order conidia until a host is reached or resources are exhausted [11]. Once inside the fly, the fungus is initially sustained by nutrients in the hemolymph then later consumes the fat body as an energy source [10]. When available resources are depleted, the fungus elicits the end of life behaviors and the fungal life cycle begins again.

A range of fly species and even non-dipterans can be infected and killed by *E. muscae* in the laboratory, though not all infected hosts manifest the stereotypical end-of-life behaviors, and susceptibility has not been found to track with host phylogeny [15,16]. *E. muscae* has almost exclusively been observed and studied in muscoid flies (especially the house fly, *Musca domestica*), organisms for which we have very few experimental tools [17]. Thus, despite inspiring curiosity and intrigue for over a century, how *E. muscae* achieves control of its host remains poorly understood, with essentially no information as to what is occurring at the molecular level in either fungus or host.

In 2015, we observed several wild *Drosophila* in separate sites in Northern California with the characteristic death pose and fungal banding of *E. muscae* infections, and saw an unprecedented opportunity to study a behavior-changing fungus in the laboratory species, *Drosophila melanogaster*. Here, we describe the isolation and subsequent characterization of this *E. muscae* strain and its impact on *D. melanogaster* behavior in the laboratory, and present the *E. muscae*-*D. melanogaster* as a model for developing a mechanistic understanding of parasitic manipulation of host behavior.

## Results

### Discovery and isolation of *E. muscae* from wild *Drosophila*

In June 2015, we established a stable food source (organic fruits in a clean dish pan, referred to henceforth as the “fendel”) at a field site in Berkeley, CA to collect wild *Drosophila* for a separate study (see [18]). In late July 2015, we noticed that several flies had died with raised wings at the bottom of the fendel and, upon closer inspection, observed remnants of fungal growth and sporulation on these dead flies (Fig S1A). We suspected that these animals had been killed by the fungal pathogen *Entomophthora muscae*, though there have been only a few reports of *E. muscae* infection in wild *Drosophila* [19–21].

We first confirmed that these flies had been killed by *E. muscae* by genotyping a dozen representative cadavers at the ITS and 28S (LSU) rDNA loci and searching for similar sequences with BLAST (Fig S1B,C). PCR genotyping of the host at the cytochrome oxidase II (COII) locus [22] demonstrated that susceptible host species included *D. melanogaster*, *D. immigrans*, *D. simulans* and *D. hydei*, which are all commonly observed in Berkeley, CA. The fungal sequences for all of the typed cadavers were identical at these two loci, consistent with one *E. muscae* strain being responsible for this epizootic event. Species identification within the *E. muscae* species complex (which will hereafter be referred to as *E. muscae*) has historically relied on conidial morphology (and, to a lesser extent, host species), but is expanding to include molecular data [23]. Still, the taxonomic boundaries between strains and species within this group are still unclear. To distinguish our strain (or possibly species) from others reported, we will henceforth refer to our isolate as *E. muscae Berkeley*.

We were intrigued by the possibility that the presence of *E. muscae* in *Drosophila* would allow us to establish an infection in lab.-reared flies. However, our initial observations were all of dead flies that had already ejected their spores (Fig S1A). Studies in *M. domestica* have shown that, at room temperature, the majority of *E. muscae*’s infectious spores are ejected within the first approximately twelve hours of an infected host’s death, and lose infectivity within 48 hours of landing on a non-host substrate [24]. Thus, to culture *E. muscae Berkeley* we needed to procure freshly-killed flies to ensure access to viable conidia.

The repeated observation of *E. muscae Berkeley*-killed *Drosophila* demonstrated that the infection was circulating in the population of flies at our field site. We therefore reasoned that some of the flies that were visiting our fendel should be infected. Previous *E. muscae* research had demonstrated that the fungus only kills hosts once a day, around sunset [9]. Thus, we collected flies once every morning (1-2 hours after sunrise) from the fendel and monitored them nightly (1-3 hours after sunset), looking for animals that had recently died in the stereotyped death pose.

Using a single, wild cadaver, we first established a culture of *E. muscae Berkeley* *in vitro*, by inoculating liquid media previously reported to support *E. muscae* growth [23]. Genotyping the resultant culture at both the ITS and 28S loci verified that we had isolated the same strain as the one that had killed the previously observed cadavers (Fig S2).

To establish an *in vivo* infection, wild cadavers were co-housed overnight in a confined space with healthy, lab.-reared CantonS *D. melanogaster*, and exposed flies were monitored nightly for two weeks to identify *E. muscae Berkeley* cadavers. We repeated this process daily for several weeks before we were able to passage the infection. We were aware that our standard fly diet contained a small amount of the preservative tegosept (0.09%), but did not anticipate that this would be problematic since infected wild flies still died of infection after being housed on this diet for up to eight days (Fig S3). However, it was only when we began housing flies on food devoid of the preservative tegosept that we were able to successfully passage the infection.

Once we had transferred *E. muscae Berkeley* to lab.-reared flies, we assessed the impacts of several variables on infection efficacy, ultimately arriving at an optimized propagation protocol (Fig S4). Briefly, we expose flies to *E. muscae* by embedding six freshly-killed, infected cadavers headfirst in sucrose agar and confining 50 young (eclosed within the past 24 hours) CantonS adults of mixed sex with these cadavers for 24 hours in a cool, humid environment on an inverted 12:12 light:dark cycle. After 24 hours, confinement is relieved and flies are transferred to a medium free of tegosept. Exposed flies are housed at room temperature with moderate humidity and monitored daily for death by fungus.



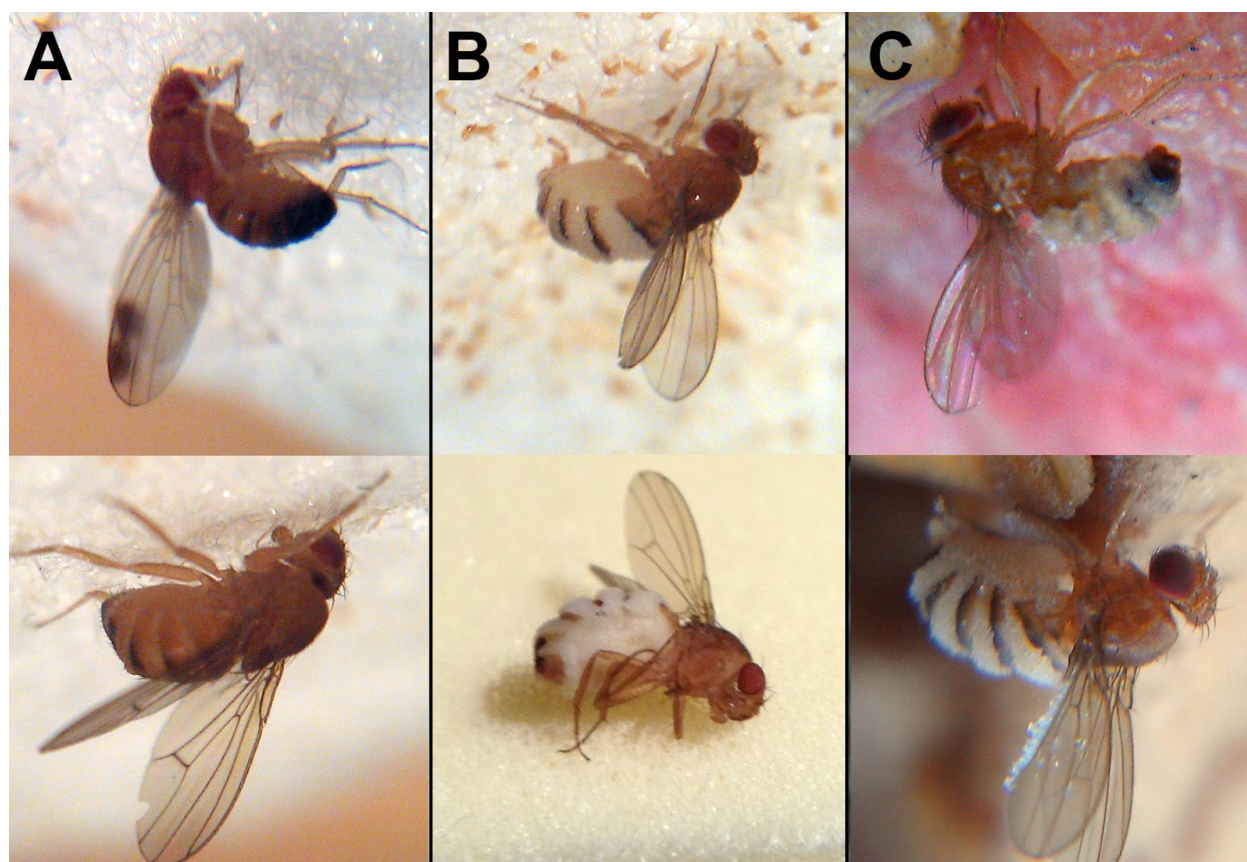

**Figure 1. Wild drosophilids killed by *Entomophthora muscae* Berkeley.** A) Cadavers found among sampled flies 65 minutes (above) and 40 minutes (below) after sunset. *E. muscae* Berkeley has not grown through the host cuticle. B) Cadavers found among sampled flies 120 minutes (above) and 160 minutes (below) after sunset. *E. muscae* Berkeley has grown through the host cuticle and will soon start to eject conidia. C) Cadavers as discovered *in situ* in fendel at least 12 hours after sunset. *E. muscae* Berkeley has grown through the host cuticle and ejected conidia, some of which have landed on the cadavers' wings.

# Description of *E. muscae* Berkeley infection in CantonS flies

With *E. muscae* Berkeley stably propagating *in vivo*, we next focused on carefully observing the process of infection in CantonS flies. By eye, infected flies are hard to distinguish from their healthy counterparts both morphologically and behaviorally until they begin to exhibit end-of-life behaviors (Fig 2A). Exposed flies bear melanized scars that form following spore entry through the cuticle, which are most apparent when the point of entry is the pale ventral abdomen. However, not all flies that are penetrated by the fungus are successfully infected and killed, as we have observed animals with scarring that survive beyond seven days after exposure, and have found that housing exposed flies on diet with anti-fungal significantly improves survival (Fig S4). At 72 hours after exposure and beyond, infected flies generally have more opaque abdomens than uninfected flies due to abundant fungal growth. Under our conditions, ~80% of

CantonS flies are killed four to seven days after exposure to *E. muscae Berkeley*, with the majority of deaths occurring at 96 and 120 hours (Fig 2B). While by eye infected animals behave normally until the onset of end-of-life behaviors, analysis of infected fly activity revealed that infected flies exhibit a marked decrease in total activity compared to healthy counterparts beginning about 36 hours before time of death, which presently is the best indication of imminent mortality for a given fly (Fig 2C).

On the last day of life, *E. muscae Berkeley* infected flies stop moving 0-5 hours before sunset (Fig 2D). Taking time of last movement as a proxy for time of death, this observation agrees with reports of *E. muscae* in house flies [9]. Also consistent with previous reports, flies exposed to *E. muscae Berkeley* and housed under complete darkness die sporadically throughout the day rather than in a gated fashion (Fig S5, [9]). As healthy flies housed for 168 hours in complete darkness maintain circadian rhythm, this suggests that environmental cues and/or a fungal clock are required to coordinate the timing of death, as has been previously suggested [9]. Of note, flies housed in complete darkness are still observed to die in elevated positions. This suggests that summing behavior relies predominantly on gravitaxis rather than phototaxis.

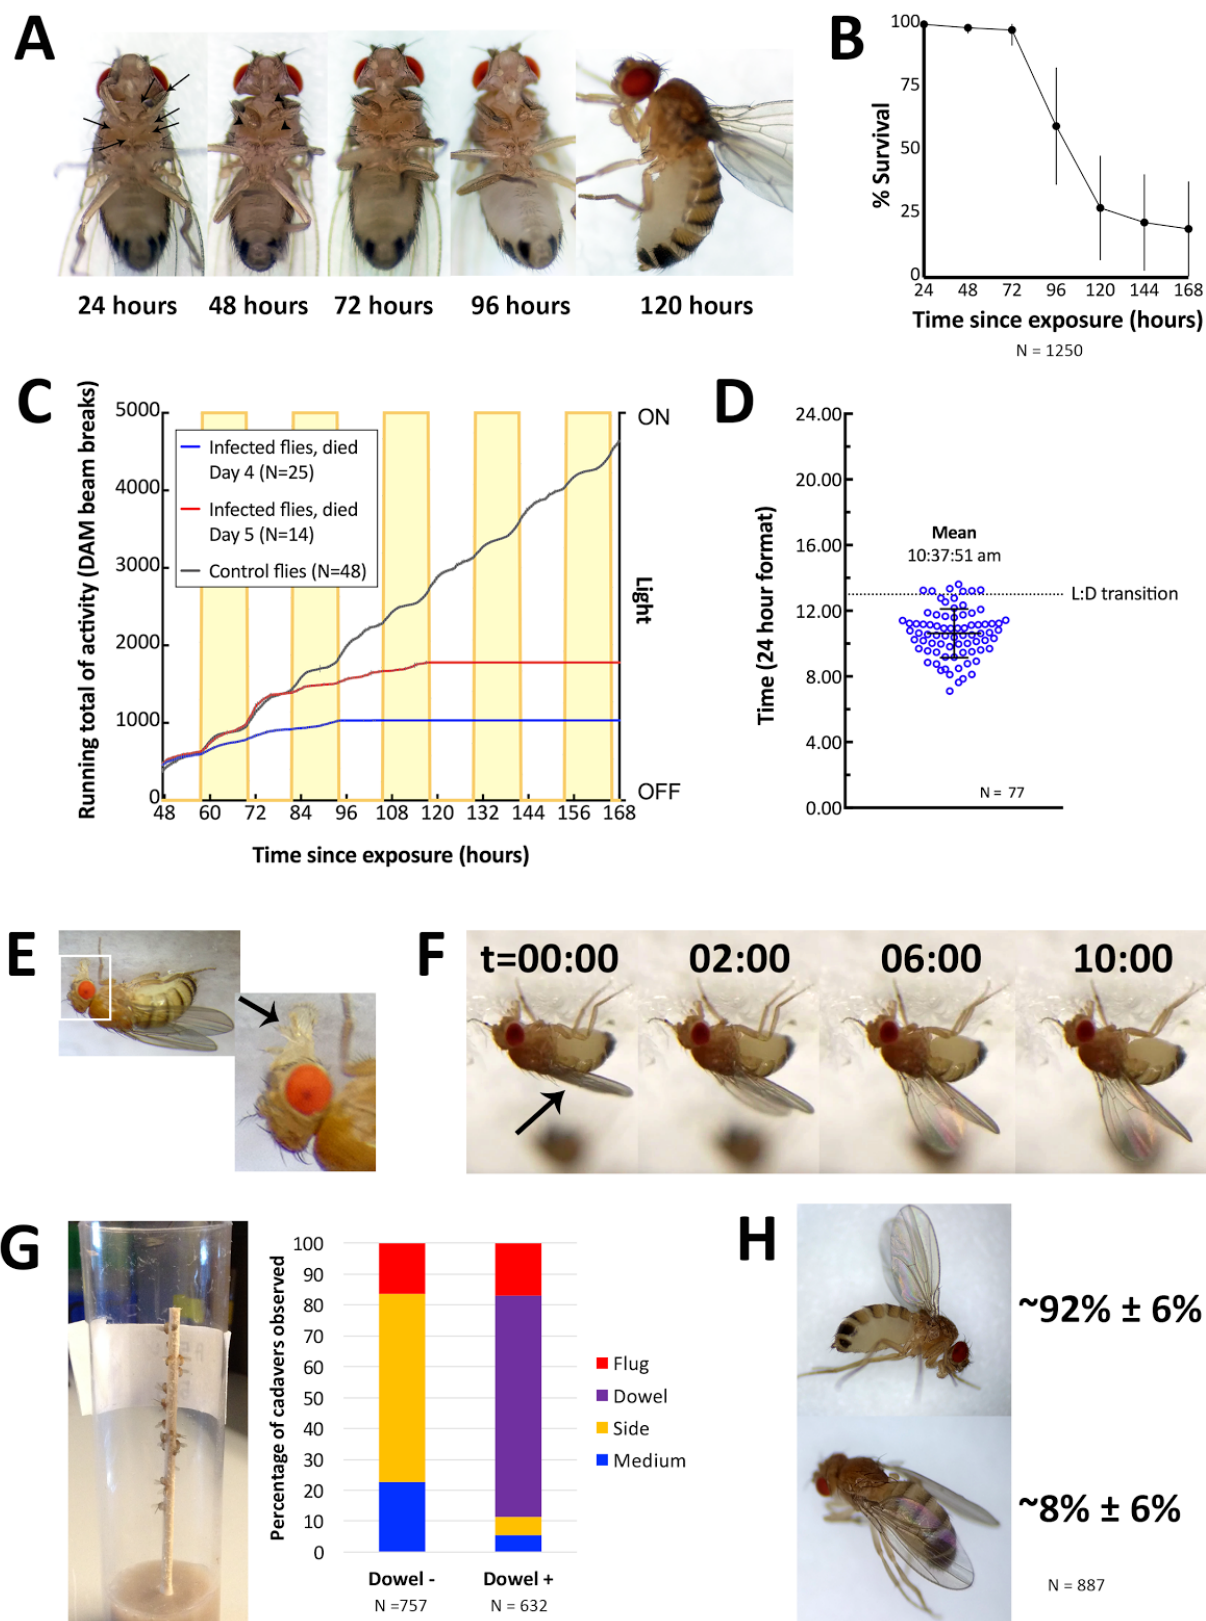

**Figure 2. Characteristics of *E. muscae Berkeley* infected CantonS.** A) Typical female fly over the course of infection. Arrows denote conidia that have landed on the cuticle but not yet bored into the hemolymph. Arrowheads indicate melanization of the fly cuticle that has occurred in response to conidia boring into hemolymph. B) Time of death for flies infected as per standardized protocol (Fig S4). C) Activity profile of control flies or *E. muscae Berkeley*-infected flies measured using the *Drosophila* activity monitor (DAM). D) Time of last movement as measured using the DAM. Each blue circle represents the time of last movement observed for one cadaver. Flies were exposed to *E. muscae Berkeley* as per standardized protocol. Dotted line indicates the light-dark transition (L:D transition). E) *E. muscae Berkeley*-infected fly exhibiting proboscis extension tens of minutes before death. Arrow indicates extended proboscis adhered to the surface. Real time footage of an *E. muscae Berkeley*-infected fly undergoing proboscis extension is available as Movie S1. F) *E. muscae Berkeley*-infected fly exhibiting wing raising immediately prior to death. Arrow indicates original positioning of wings. Time elapsed is given in minutes:seconds. Real time footage of an *E. muscae Berkeley*-infected fly undergoing wing raising is available as Movies S2, S3. G) *E. muscae Berkeley*-killed CantonS summited and adhered to a wooden dowel. Graph to the right indicates position of death for flies housed in vials without (Dowel -) or with (Dowel +) a wooden dowel. H) Most commonly observed wing positions of *E. muscae Berkeley*-killed CantonS. Complete wing raising is observed in most cadavers; wing lowering is consistently observed in a small fraction of cadavers.

On the last day of life, flies infected with *E. muscae Berkeley* show a precipitous decline. The first portent of imminent death is that flies cease to fly. Though they can still walk and are responsive to perturbations (i.e. poking with a paintbrush or jostling their container), they will not take flight. After they have lost the ability (or desire) to fly, moribund flies will begin to exhibit a shaky and slowed gait which is usually coincident with an upward climbing or movement towards a vertical surface. Many flies reach elevated positions before they lose the ability (or desire) to continue moving (even when perturbed by the experimenter), but some succumb to immobility before they leave the ground. When provided a thin, wooden dowel as a summing substrate, more flies are observed to die in elevated positions, mostly on the dowel itself (Fig 2G). Interestingly, we have noticed that when drips of medium are present on the side of a vial, flies that die on the side of the vial are preferentially found on these drips. It is unclear if this indicates a preference for the medium as a climbing substrate (versus the smooth plastic of a fly vial) or if the flies are attempting to eat until their very last.

Once the fly stops walking, it extends its proboscis until it makes contact with the surface on which it is standing (Fig 2E). The extension of the proboscis is shaky and can occur slowly relative to extension in response to a nutritive stimulus, and we have observed in multiple instances that the labella of infected flies do not spread as is typically observed when uninfected flies eat (see Movie S1). Typically, once the



proboscis has made contact with the surface, the fly may move its legs in what appears to be an apparent attempt to escape, but the material that emanates from the proboscis is sufficient to keep it anchored in place. After the proboscis has adhered, the fly then begins to raise its wings up and away from the dorsal abdomen (Fig 2F). This process has been observed to take on the order of ~10 minutes, with wing raising occurring in small bursts, reminiscent of the inflation of a balloon (see Movies S2 and S3). Curiously, a persistent minority of infected flies die with their wings lowered down onto their abdomen rather than with wings elevated (Fig 2H). By applying pressure to the thorax of these flies, the wings are observed to “toggle” into the upright position, suggesting that the same muscles are involved in raising and lowering. The fly may continue to twitch its legs and antenna for several minutes after the wings have reached their final position but will shortly cease moving.

After death, the fungus inside of the fly continues to differentiate into conidiophores, conidia-launching structures, that grow out into the environment through weak points in the fly’s cuticle. Over the course of several minutes, each conidiophore forms a single primary conidium (Movie S7) which, upon maturation, is forcibly ejected into the environment. Using time lapse imaging, we observe that conidia begin to launch approximately five hours after sunset and continue doing so for several hours at ambient temperature and humidity (Fig 3A). We observed that conidia form and launch asynchronously within a given cadaver, and not all conidiophores are guaranteed to launch what appear to be mature conidia. Using high speed videography, we were able to capture the motion of conidial ejection (Fig 3B), and determine that conidia leave the conidiophore at an initial velocity of ~21 miles per hour (~9.4 meters/second). These speeds are comparable to those observed in coprophilous fungi, which are among the fastest observed velocities of organisms relative to their size known in the natural world [25]. In addition, we obtained high speed footage of primary conidia landing (Fig 3C), which shows conclusively that conidia and halo land concurrently, an observation that supports the fungal canon mechanism of spore discharge [26].

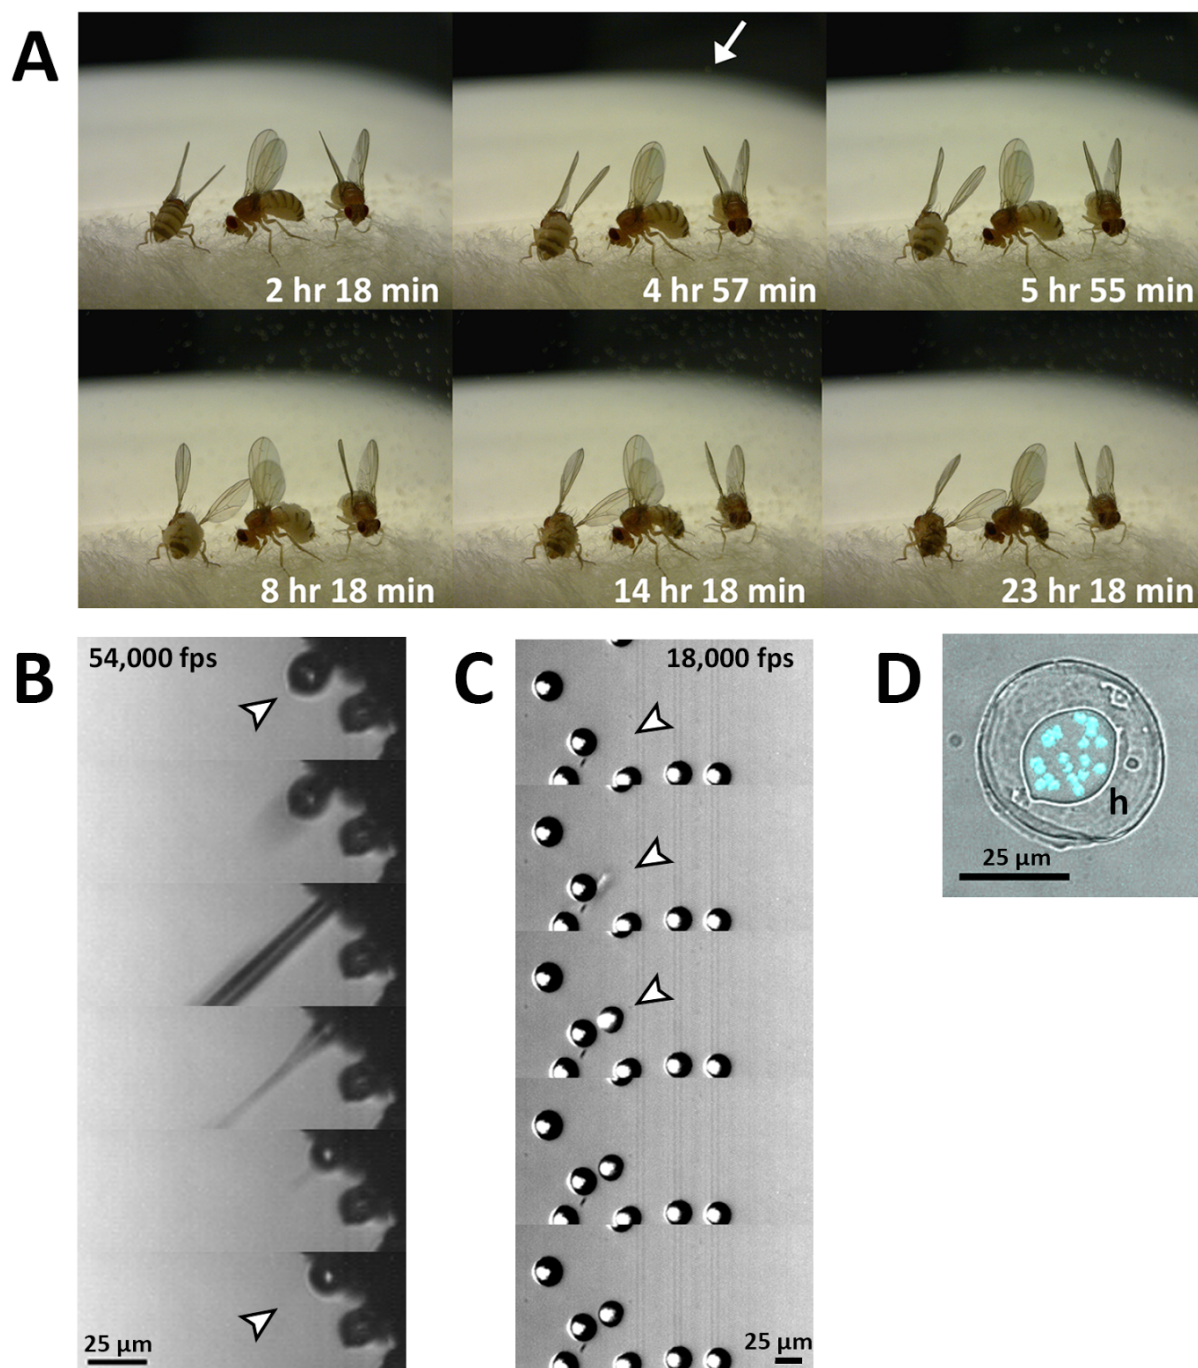

**Figure 3. Fungal transmission from *E. muscae* Berkeley killed cadavers.** A) Sporulation time lapse in *E. muscae* Berkeley killed cadavers. Time listed in each frame is the time that has elapsed since the light-dark transition. One image was taken every minute for ~24 hours with three cadavers situated on a cotton flug at ambient temperature and humidity. The arrow in the second frame indicates the first primary conidium observed to land on the camera's lens, indicating the start of conidial ejection (i.e. sporulation). Animated time lapse available as Movie S4. B) Time lapse of the ejection of a primary conidium from a

sporulating cadaver as captured at 54,000 frames per second (fps). Arrowheads indicates conidium that launches and the vacant conidiophore that remains after launch. Animated time lapse available as Movie S5. C) Time lapse of a primary conidium landing on the lid of a coverslip as captured at 18,000 fps. The conidium lands as one complete unit, supporting the fungal cannon mechanism of primary conidium ejection in *E. muscae*. Arrowheads indicates the position where the primary conidium lands. Animated time lapse available as Movie S6. D) Primary conidium adhered to glass coverslip and stained with fluorescent nuclear dye (Hoechst 33342). The conidium is surrounded by a halo of co-ejected material (h).

To compare *E. muscae* Berkeley with other reported isolates, we collected primary conidia and measured their key morphological traits (e.g. Fig 3D). Our measurements are most similar to primary conidia from *E. muscae sensu strictu* rather than other members of the *E. muscae* species complex (Table 1). As expected, secondary conidia were observed to form from primary conidia that had landed on non-productive surfaces (host wing or agar substrate) (Movie S8).

**Table 1. Morphology of primary conidia of *E. muscae* Berkeley compared to other reported *E. muscae* strains.**

| Report                     | Isolated from          | Infected host          | # of nuclei       | Diameter of nuclei (μm) | Conidium length (μm)  | Conidium width (μm)   |
|----------------------------|------------------------|------------------------|-------------------|-------------------------|-----------------------|-----------------------|
| Present study <sup>1</sup> | <i>Drosophila</i> spp. | <i>D. melanogaster</i> | 13.9-14.9 (8-22)  | 3.7-4.1 (2.8-5.8)       | 23.5-26.1 (19.2-31.8) | 18.4-20.5 (14.6-26.7) |
| [21] <sup>2</sup>          | <i>Drosophila</i> spp. | <i>Drosophila</i> spp. | 15.3-15.9         | 4.4                     | 26.0-27.6 (23-30)     | 21.7-22.9 (17-27)     |
| [27] <sup>3</sup>          | <i>M. domestica</i>    | <i>D. suzukii</i>      | 12.8-13.8 (11-16) | NA                      | 27.9-29.1 (25.2-36.8) | 22.4-23.2 (19.7-27.6) |
| [28] <sup>4</sup>          | <i>M. domestica</i>    | <i>M. domestica</i>    | 15.2-20.2 (10-27) | 3.9-4.4 (3.5-5.5)       | 26.9-31.1 (21-35)     | 20.4-24.2 (16-29)     |

<sup>1</sup> Measurements are given as range in means of three series of 50 objects per host.

<sup>2</sup> Measurements given as reported, unknown number of conidia measured

<sup>3</sup> Measurements are given as reported, nuclei of 12 conidia from one animal were counted, 20 conidia were measured for length and width



<sup>4</sup>Redescribed type species of *E. muscae* in type host, *M. domestica*, for reference. Measurements were taken of 8-27 series of 50 objects per host.

# Transcriptional profiles of *E. muscae Berkeley* and *D. melanogaster* over the course of infection

To gain a first comprehensive look into how *E. muscae Berkeley* infection progresses in *D. melanogaster* at the molecular level, we next measured how transcription changes in both host and fungus at 24 hour time points. We knew that in any given exposure vial there are a mix of infected and uninfected animals and faced the complication that, early on, infected flies are phenotypically indistinguishable from uninfected animals. However, we felt confident that we would be able to distinguish infected from uninfected exposed animals after sequencing mRNA since a) only a few *E. muscae Berkeley* reads would be needed to confirm that *E. muscae Berkeley* was present and b) it would be unlikely that infected and uninfected exposed animals would demonstrate identical transcriptional profiles. To favor our chances of collecting three infected flies for each time point, we collected six *E. muscae Berkeley* exposed CantonS females at each 24, 48 and 72 hours, three exposed flies at 96 hours, and six fresh cadavers, three at each 96 hours and 120 hours. In parallel, we collected three CantonS females at each time point that were subjected to a “mock” exposure (housed under identical conditions but in the absence of cadavers). We prepared and sequenced mRNA libraries from each individual sampled, then aligned the reads to the *D. melanogaster* transcriptome reference and a bespoke *E. muscae Berkeley* transcriptome reference, which was assembled from reads that failed to align to the *D. melanogaster* reference. This initial *E. muscae Berkeley* transcriptome was contaminated by some fly RNAs. After removal of the bulk of contaminating transcripts based on BLAST alignment and expression levels, our final *E. muscae Berkeley* reference contained 86,509 transcripts, including a small number of contaminating *Drosophila* transcripts to which an average of 2.6% of reads from uninfected, control flies aligned (see Methods for details).

We first examined the percentage of reads that aligned to host or fungus in each of our time course samples (Figure 4A). We observe that *E. muscae Berkeley* reads are low abundance until 72 hours after exposure at which point a significant portion of the total reads align to the *E. muscae Berkeley* transcriptome. This likely reflects that the fungus does not begin to actively divide until between 48 and 72 hours and is consistent with our previous observation that *E. muscae Berkeley* rRNA is not reliably detectable by endpoint reverse transcription PCR until at least 72 hours after exposure (Fig S6). Notably, the majority of reads from cadavers align to *E. muscae Berkeley* rather than fly. Strikingly, two of our cadavers show only trace amounts of *D. melanogaster* RNA at the point of sampling.

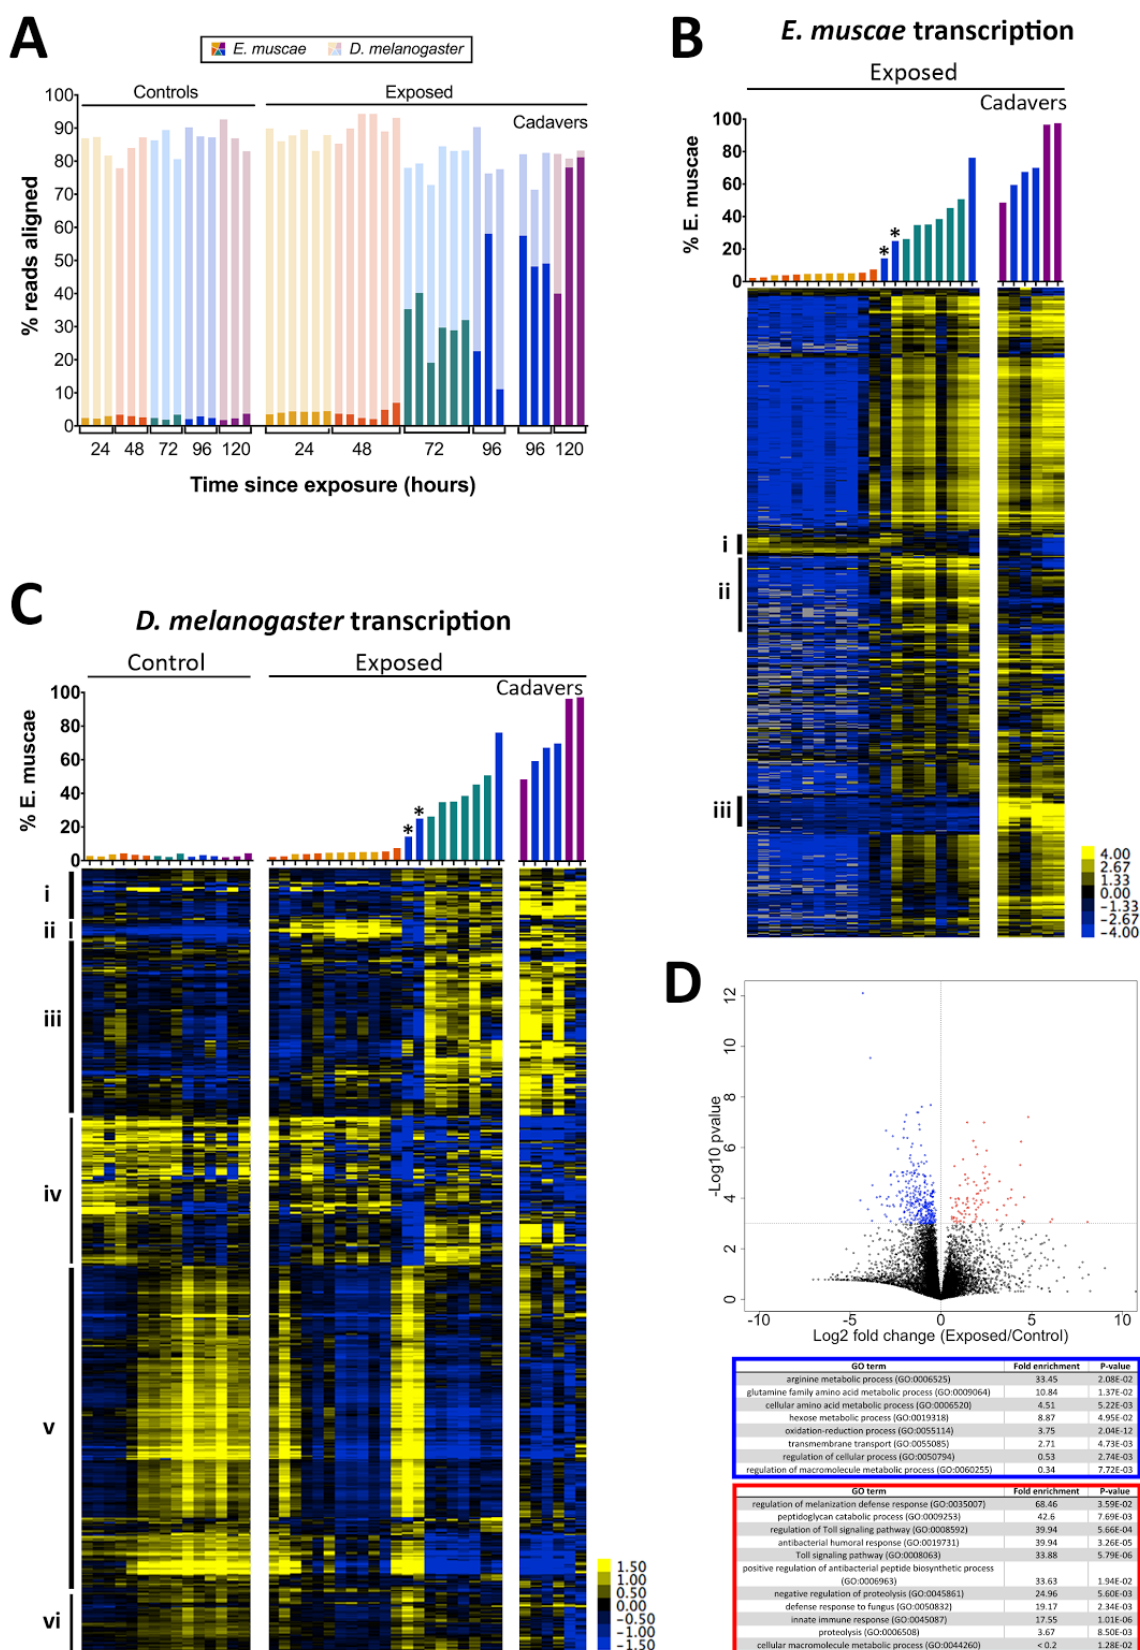

**Figure 4. Gene expression time course of *E. muscae Berkeley*-infected CantonS flies.** A) Percentage of reads aligned to *D. melanogaster* reference versus *E. muscae Berkeley* reference using Kallisto. Samples are separated into controls (healthy animals who were mock exposed), exposed (animals who exposed to *E. muscae Berkeley* and were alive at the time of sampling) and cadavers (animals who were killed by *E. muscae Berkeley*, dead at the time of sampling) and are color-coded according to the time point at which they were collected (i.e. 24, 48, 72, 96 or 120 hours). B) *E. muscae Berkeley* expression data from *E. muscae Berkeley*-exposed and cadaver samples. Complete linkage hierarchical gene clustering by gene was performed in Gene Cluster 3.0 after filtering out across all genes that are expressed at least at ten TPM in at least three out of 27 samples (10,809 transcripts total), then log transforming and centering on the mean value for each transcript. Samples are ordered by percentage of *E. muscae Berkeley* reads as a fraction of the total reads aligned (above). The scale bar for the heatmap is given to the right of the plot. Two 96 hour exposed samples that show an aberrant immune response compared to all other exposed samples are indicated by asterisks. C) *D. melanogaster* expression data from control, *E. muscae Berkeley*-exposed and *E. muscae Berkeley*-killed cadavers. Complete linkage hierarchical gene clustering by gene was performed in Gene Cluster 3.0 after filtering out across all genes that are expressed at least at two TPM in at least three out of 42 samples (10,875 transcripts total), then log transforming and centering on the mean value for each transcript. Samples are ordered by percentage of *E. muscae Berkeley* reads as a fraction of the total reads aligned (above). The scale bar for the heatmap is given to the right of the plot. Two 96 hour exposed samples that show an aberrant immune response compared to all other exposed samples are indicated by asterisks. D) Genes that are consistently over or under-expressed compared to controls over the first 72 hours after exposure to *E. muscae Berkeley*. Top: Volcano plot for all genes over the first 72 hours after exposure. P-value is determined by ANOVA grouping 24-72 hour control vs. 24-72 hour exposed samples. Genes with p-value below 0.001 are shown in color. Bottom: Panther GO-term analysis (complete biological process) of genes overexpressed (red) or under-expressed (blue) in exposed animals compared to controls.

We next surveyed gene expression in *E. muscae Berkeley* across our exposed samples. As different exposed individuals vary in their rate of infection by *E. muscae Berkeley*, we reasoned that it would be most informative to order our samples based on *E. muscae Berkeley* titer, which we approximated using the proportion of reads that aligned to *E. muscae Berkeley* of total reads aligned to either the *E. muscae Berkeley* or *D. melanogaster* references (Figure 4B). The bulk of transcripts are not expressed until three days after exposure, which could simply be a consequence of the fungus being low abundance until this time point. Interestingly, there are three groupings of genes (Groups i-iii) that demonstrate patterns that cannot be explained merely by fungal abundance in the samples. Group i consists of genes that are expressed early and depressed later on in infection, Group ii contains genes that turn on during the later phases of growth

in the living host but are turned off after the fly is killed and Group iii consists of genes that do not turn on until after the fungus has killed the host. At present, there is almost nothing known what gene products these transcripts encode, as there is little homology between entries in protein databases and the translated open reading frames in these transcripts.

Next, we examined host gene expression patterns across all of our samples, again ordering samples based on the proportion of *E. muscae Berkeley* aligned reads among all total and clustering genes by expression pattern (Figure 4C). Host gene expression segregates into six major groupings (Table S1). Group i and Group iii contain genes with low expression in controls and early infection, but increased expression as infection continues, and are enriched for genes involved in epithelial integrity and sensory processes, respectively. Group ii shows induction of expression all exposed samples except for two taken at 96 hours (asterisks) and is highly enriched for genes involved in the innate immune response to fungi. Group iv contains genes that, broadly speaking, are expressed in controls and early infection but not during later infection and is enriched for genes involved in the metabolism of carbohydrates, steroids and lipids, as well as cellular respiration. Group v and Group vi largely trend in the same direction, with genes in both groups tending to be expressed in control samples 72 hours and later and a handful of exposed samples, including three samples (one 48 hour sample and two 96 hour samples) that behave aberrantly compared to other biological replicates. These groups are enriched for genes with functions in broad and basic cell functions including DNA synthesis and repair, transcription, translation and cell cycle control (Group v) as well as protein localization, mitochondrial translation, autophagy and homeostasis (Group vi).

Following our initial overview of host transcription, we next looked at genes that were consistently different between control and exposed samples from 24-72 hours (Figure 4D). We excluded all cadaver samples (both 96 and 120 hours) from this pooled analysis because the animals are dead, and variations in gene expression would be confounded by mRNA degradation. We also opted to exclude animals at 96 hours because two of these three samples do not show immune induction (Figure 4C, Group ii). One-way ANOVA analysis between exposed and control animals from 24-72 hours demonstrated that genes that are under-expressed in exposed animals are enriched for a handful of metabolic processes, including arginine and glutamine synthesis. Interestingly, both arginine and glutamine are amino acids synthesized from the Krebs's cycle intermediate alpha-ketoglutarate. In times of starvation, the cell would be expected to prioritize generating ATP via the Krebs's cycle over synthesizing these amino acids. The idea that the fly is starving is consistent with these enrichments and also with the observation that basic cell metabolism (macromolecule synthesis) is substantially decreased at 72 hours (Fig S7).

The same analysis shows that genes that are over-expressed in exposed animals are enriched for immune function, including the melanization defense response and Toll-dependent pathways. *E. muscae Berkeley* infection relies on boring through the host cuticle which should elicit an initial melanization

response, consistent with our observation. However, it is generally thought that *E. muscae Berkeley* evades the host immune response once inside the fly because it grows without a cell wall (i.e. protoplastically) and therefore does not present antigens that can alert the fly immune system to infection [29,30]. Examining expression patterns of all genes annotated as having immune function, we see a large induction of immune gene expression at 24-48 hours which includes genes both involved in the melanization response and genes that specifically respond to fungal infection. In addition, we see overexpression of several groups of immune genes compared to uninfected controls that persists into late infection (72 and 96 hours) and even into death (96 and 120 hours) (Fig S8) These data suggest that the initial immune response may not be strictly limited to wound repair and show that the host immune system remains engaged throughout infection.

### *E. muscae Berkeley* is present in the fly nervous system 48 hours after exposure

To better understand the process of *E. muscae Berkeley* infection in *D. melanogaster*, we next used a histological approach to examine the interior anatomy of exposed flies. Analogous to the transcriptomic time course, we collected adult flies (a mix of 50 males and females) every 24 hours for the first 168 hours after *E. muscae Berkeley* or mock exposure. Flies were fixed before embedding and sectioning in paraffin then stained with Safranin O/Fast Green (SFG), a contrast staining method that facilitates the differentiation of fungal versus host cells (Richard Humber, personal communication), though is more commonly used for plant histology. We identified *E. muscae Berkeley* morphology by examining *E. muscae Berkeley*-killed hosts. While there is slide-to-slide variability in the exact hue for a given tissue stained with SFG, generally, we observed that SFG-stained *E. muscae Berkeley* hyphal bodies have nuclei that stain red (or dark purple) and cytoplasm that stains purple (Figure 5). *E. muscae Berkeley* nuclei are consistently sized throughout the host which helps in distinguishing them from host *D. melanogaster* cells.



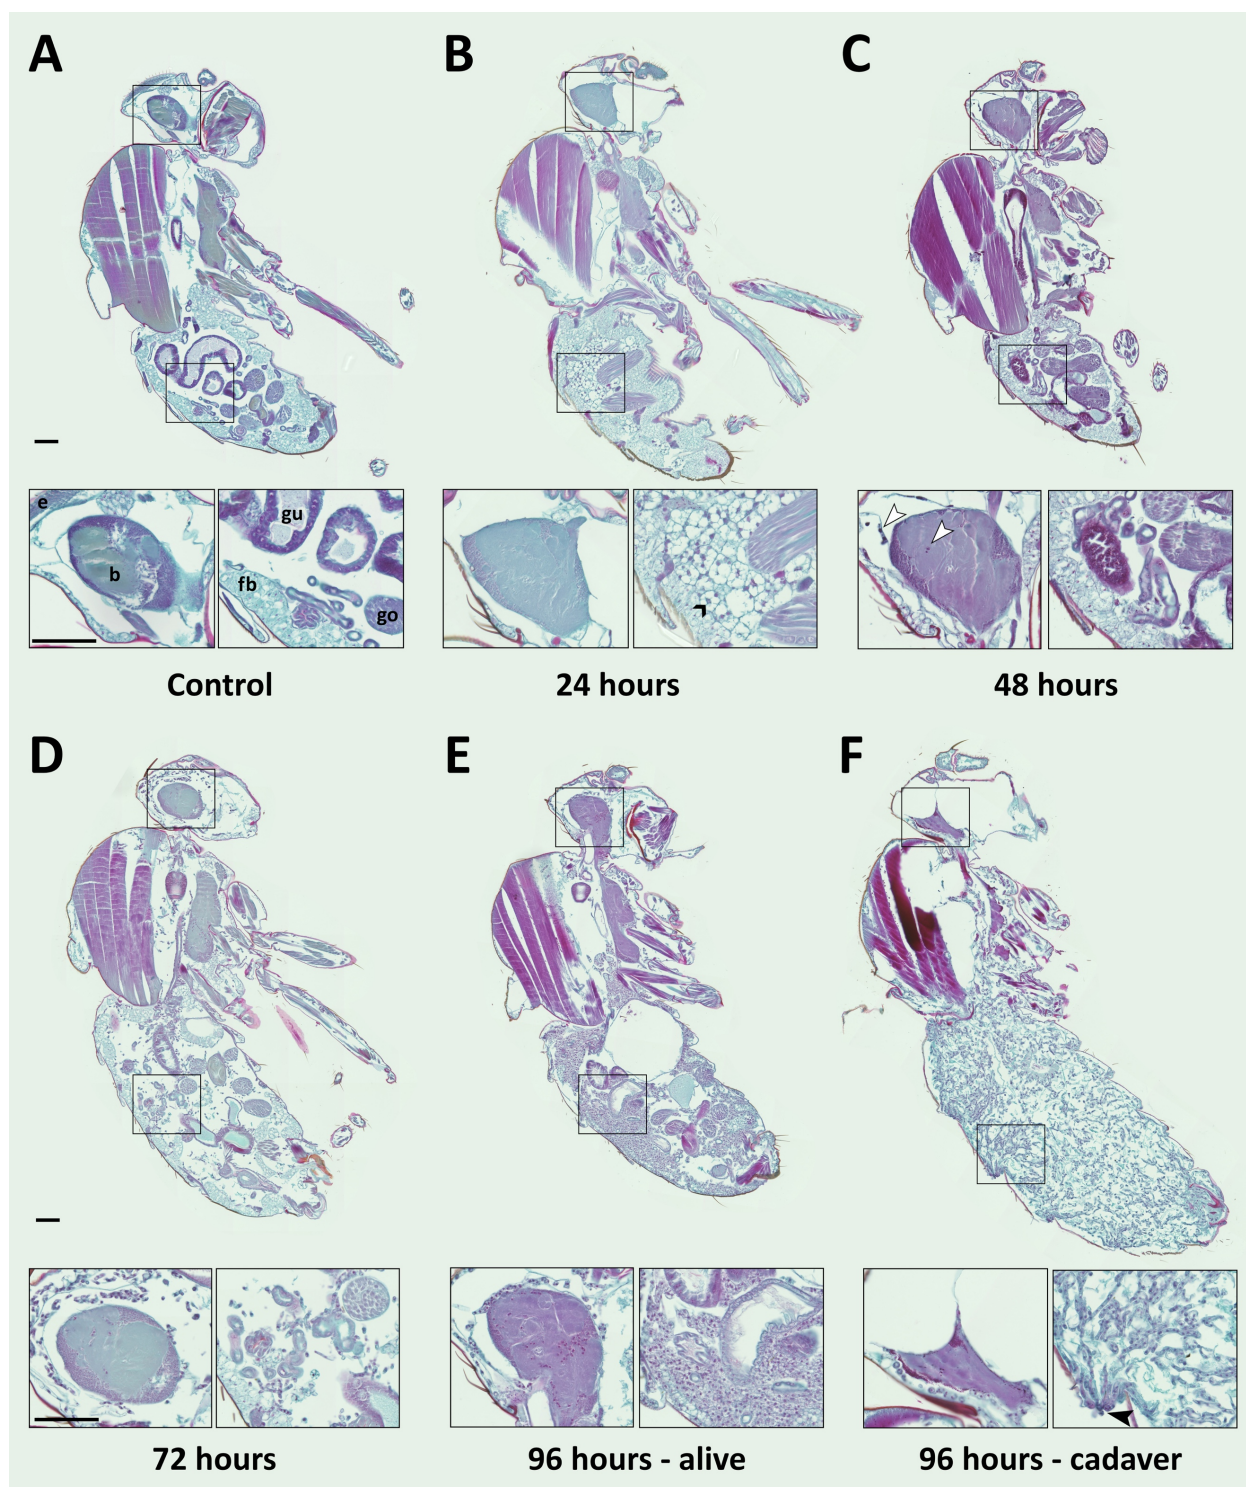

**Figure 5. *E. muscae Berkeley* is consistently present in the nervous system starting 48 hours after exposure.** CantonS flies were exposed or mock-exposed (control) to *E. muscae Berkeley* starting 3-5 hours after the light-dark transition and were subsequently sampled at 24, 48, 72 or 96 hours for histological analysis. For each time point, 4-6 individual, paraffin-embedded flies were sectioned at 8  $\mu$ m, stained using

Safranin O/Fast Green to identify fungal morphology and location and imaged at 20x magnification (Zeiss Axio Scan.Z1 slide scanner). Only male flies are shown here for ease of comparison. No differences in the progression of the infection were observed between males and females. An inset of the brain and the abdomen are shown for each sample. A) Uninfected fly with major anatomical features labeled as follows: e - eye, b - brain, g - gut, t - testes, f - fat body. B) At 24 hours after exposure there is significant immunological activity in the abdomen; the nervous system is devoid of fungal cells. C) At 48 hours after exposure *E. muscae Berkeley* cells are present in the brain (white arrowheads) and/or ventral nerve cord (VNC) of all but one sample where *E. muscae Berkeley* cells abut but have not yet entered brain. A handful of *E. muscae Berkeley* cells are observed in the abdominal and/or thoracic hemolymph at 48 hours. The gut and testes are not invaded by fungus. D) At 72 hours after exposure, *E. muscae Berkeley* can be found throughout the body cavity and the amount of visible fat body has decreased. *E. muscae Berkeley* titers have increased in the nervous system. E) In a living fly at 96 hours after exposure (the first point at which a fly may be killed by *E. muscae Berkeley* infection), fungus occupies virtually all available volume in the hemolymph. *E. muscae Berkeley* titers have increased in the nervous system, gut and gonads remain uninvaded. F) In an *E. muscae Berkeley*-killed fly (cadaver) at 96 hours after exposure, only traces of host organs remain in the abdomen and the nervous system has been considerably degraded. No fat body cells are observed. *E. muscae Berkeley* cells differentiate into conidiophores, cell-walled structures that will pierce through weak points of the cuticle to produce and launch infectious conidia. Black scale bars are 100  $\mu$ m. All living animals shown are males; cadaver's sex is undetermined (the gonads have been consumed by the fungus.)

We then carefully examined SFG-stained sections from exposed and control flies to determine where the fungus resides and how fly tissue is impacted over the course of infection (Figure 5). As we observed no difference in fungal localization between males in females, all samples from a given time point are described regardless of sex. In control animals, sagittal sections consistently show abundant fat body cells in the abdomen surrounding the gut and gonads. Fat body is also apparent, though less abundant, in the head and thorax. The thorax is predominantly occupied by muscles (generally staining red), which are also observed in the legs. At 24 hours after exposure, we observed hemocyte activity in the abdomen, with all other tissues indistinguishable from controls. Though hemocyte activity indicates that the immune system is responding to the fungus, we could not unambiguously identify the fungal cells anywhere in the body cavity at this time point. We must therefore conclude that the fungus adopts a morphology that is different from that of cadavers.

At 48 hours after exposure, fungal cells are consistently observed in the brain and/or ventral nerve cord (VNC; 4 out of 5 samples). In the one case where fungus had not invaded the nervous system, hyphal



bodies were apparent immediately adjacent to the brain, abutting the blood brain barrier. A handful of fungal cells are also observed in the abdomen or thorax, with some samples showing hemocyte activity as in 24 hour samples. At 72 hours after exposure, fungal growth is apparent throughout the body cavity and some hemocyte activity can still be observed. The fat body is depleted compared to earlier time points and fungus is apparent between muscle fibers, but the gut and gonads all appear indistinguishable from controls. In addition, fungal titers increase in the brain and VNC. In infected animals that survived 96 hours, fungal growth is rampant throughout the entire body cavity (head, thorax and abdomen), with the fat body substantially depleted and fungus residing between muscle fibers. There is no apparent damage to the gut or gonads. Occasional hemocyte activity can still be observed; fungal titers continue to increase in the brain and VNC. In *E. muscae Berkeley* killed cadavers, fungus is apparent throughout the body cavity, especially in the abdomen. The gut and gonads have been completely degraded by the fungus, the brain has begun to be degraded and the muscles are largely intact.

To confirm that the morphologies observed in the nervous system at 48 hours after exposure and beyond were *E. muscae Berkeley*, we used fluorescence *in situ* hybridization (FISH) to specifically label *E. muscae Berkeley* cells within the context of an infected fly. By performing FISH with a fluorescently-labeled DNA probe targeting the most abundant repeated 18mer in the *E. muscae Berkeley* genome (~11,000 copies, Bronski, Elya and Eisen, unpublished), we verified that *E. muscae Berkeley* is present in the brain and VNC in infected animals (Figure 6).

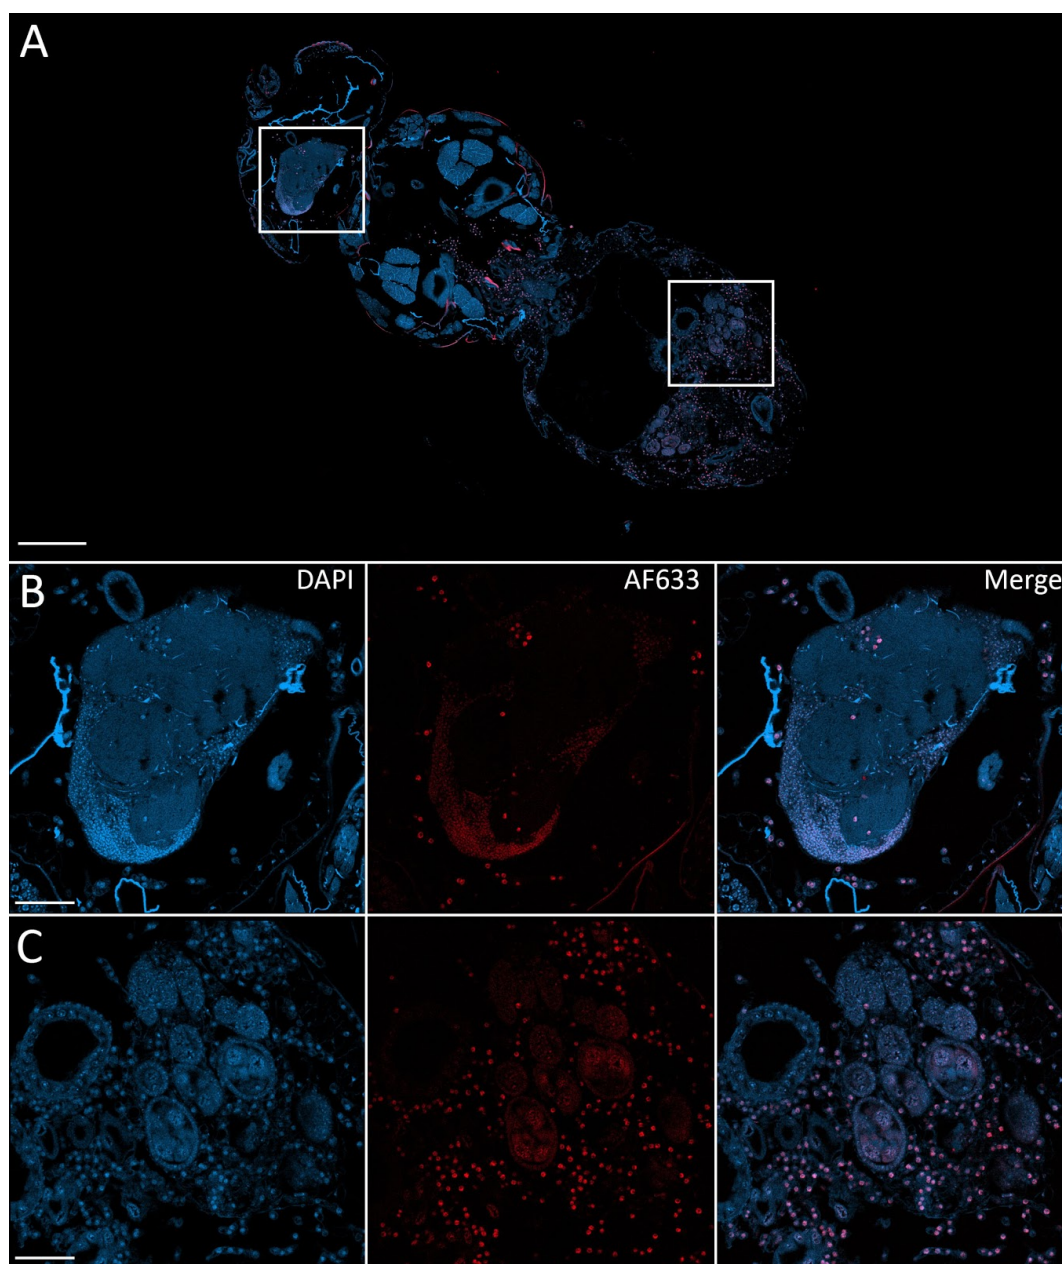

**Figure 6. Fluorescence in situ hybridization confirms that *E. muscae Berkeley* resides in the nervous system during infection.** CantonS flies were exposed or mock-exposed (control) to *E. muscae Berkeley* starting 3-5 hours after the light:dark transition and were subsequently sampled at 24, 48, 72 or 96 hours for histological analysis. For time points 48 hours and later, at least 3 individual, paraffin-embedded flies were sectioned at 8  $\mu$ m and subjected to FISH with an *E. muscae Berkeley*-specific 18mer DNA probe labeled at the 5' end with AlexaFluor633. Sections were imaged at 40x magnification on a confocal fluorescent microscope (Zeiss 800 LSM). A) Pseudo-coronal section of a female sampled 96 hours after infection stained with an *E. muscae Berkeley*-specific probe and DAPI. Regions shown at higher detail in B and C located are denoted by white boxes. Scale bar is 200  $\mu$ m. B) Enlargement of top region in A

showing each DAPI, AlexaFluor633 and merged images of this area. *E. muscae* Berkeley nuclei are strongly labeled and can be observed inside the host neuropil. Fungal nuclei are also observed in the head outside of the brain. Scale bar is 50  $\mu$ m. C) Enlargement of bottom region in A showing each DAPI, AlexaFluor633 and merged images of this area. *E. muscae* nuclei are observed in abundance outside of gut and ovaries. Scale bar is 50  $\mu$ m.

## Discussion

A remarkably diverse array of microbes have independently evolved the ability to alter animal behavior. The prospect of understanding how they do this is intrinsically fascinating, and potentially of great practical value as a means to understand how animal behaviors are generated and how we might manipulate them in disease therapy, pest control and other contexts. While an increasing number of researchers have been drawn to these systems, sustained progress has been limited by the lack of anything approaching an ideal model system. We believe that the combination presented here of a strain of *E. muscae* that infects wild *Drosophila*, protocols for propagating this strain in lab.-reared flies, and the robust induction of behaviors in the laboratory has the potential as to serve the model system that finally allows us to successfully wield the tools of modern molecular genetics and neuroscience to describe the molecular mechanisms that underlie at least one example of microbial manipulation of animal behavior.

### *E. muscae* in wild drosophilids

Though to our knowledge we are the first to study a naturally *Drosophila*-infecting strain of *E. muscae* in the laboratory, we are not the first to encounter *E. muscae* circulating in wild *Drosophila*. In 1927, Goldstein reported finding *Empusa muscae* (now *E. muscae*)-infected cadavers of *Drosophila repleta* as well as *Musca domestica* at Columbia University in New York state, stating that an epidemic of *E. muscae* had been observed for the previous four years in this location [20]. In 1969, Turian and Wuest reported observing *E. muscae*-infected cadavers of wild *Drosophila hydei* in a rotting fruit bait in Geneva, Switzerland [19]. In 2002, Keller et. al. reported morphological parameters for an *E. muscae* strain (putatively identified as *E. ferdinandii*, a member of the *E. muscae* species complex) infecting *Drosophila spp* in Switzerland [21].

Notably, the discovery of *E. muscae Berkeley* has not been our only observation of *E. muscae* infecting wild fruit flies. In fall of 2014, members of our group caught two individuals from the southern bay area that were some days later found killed by *E. muscae* (Quan and Schiabor, unpublished). During a return to the same site in fall 2015, we recovered several additional *E. muscae* cadavers. In the fall of 2016, a wild drosophilid collected from a site in the north bay was also killed by *E. muscae*. Interestingly, all of

these samples from Northern California, including those found in the fendel, are identical at the LSU and ITS loci. Samples recovered from a colleague at two distinct locations in Southern California show distinct sequences at these loci, suggesting that multiple strains (or species) are infecting wild *Drosophila*. Drawing from these observations as well as other unpublished reports of *E. muscae* infections in fruit flies across the continental United States (D. Tighe, S. Dara, B. de Bivort), we propose that *E. muscae* infections in wild *Drosophila* populations are more common than heretofore recognized. Based on our experience, the infections seem to be positively correlated with high, local densities of fruit flies in temperate habitats, which is consistent with how *E. muscae* infection is propagated.

It remains unclear both 1) if the strain(s) or species infecting *Drosophila spp* are distinct from those that infect other fly species and 2) the degree of specificity for *Drosophila spp* over other dipterans. We have observed that *E. muscae* Berkeley-infected *D. melanogaster* cadavers are capable of infecting *M. domestica* in the laboratory, but it is unclear if this infection occurs frequently in the wild. Whether infection can occur naturally would depend on the ecology of the two different host species (i.e. if they interact frequently enough to expect the exchange of *E. muscae* infection) Our understanding of strain diversity and host specificity would greatly benefit from the collection of more molecular and ecological data.

#### The progression of *E. muscae* Berkeley infection in lab.-reared *D. melanogaster*

Taken together, our RNAseq and histology time course data describe the typical progression of *E. muscae* infection in lab.-reared *D. melanogaster*. At 24 hours after exposure, flies show a robust antifungal immune response, though the fungus is nearly undetectable within the fly by histology, indicating that it is at low titer. At 48 hours, the fungus has begun to adopt the morphology which it will assume until killing the host. Fungus is observable within the host brain and VNC, though overall fungal titer is still quite low. As the abdomen is the most likely point of initial entry for the fungus (it is the biggest target for the fungus to hit), we suspect that the fungus has travelled from the point of entry to the CNS, indicating tropism for neural tissue early in the infection. Elements of the host's immune response are still activated. At 72 hours, fungus was apparent throughout the body cavity, in the thorax (between muscle fibers), abdomen (surrounding but not invading the gut and gonads) and also in the limbs and halteres. The fat body is significantly depleted by this point; the host's dampened metabolism suggests an internal starvation state. At 96 hours, if the fly has not succumbed to infection (i.e. there are still energy reserves available to the fungus), fungal titer will continue to increase and the fat body will continue to be depleted. Two-three hours after death, flies that have been killed by the fungus show no intact abdominal organs and nervous systems that are being broken down.

While the trajectory of infection is consistent, it is important to recognize that just because two animals have been exposed for the same duration of time that these two animals will not progress through

infection identically. In our RNAseq data, we noticed that the host gene expression in exposed animals at 24 and 48 hours tended to be more variable than those for 72 hours. We imagine that this was due to chance, that we picked animals that were at similar points in infection at 72 hours, whereas we picked animals that were more variable at other time points. This may at least partly explain why we observed so much differential expression at the 72 hour time point in exposed versus controls whereas less was observed at earlier time points, especially at 48 hours. It is likely that several factors play into whether or not an infection succeeds and how quickly it progresses (e.g. initial exposure titer, size of host, nutritional status of host etc.). Thus, future work should consider how to determine a metric to gauge progress of infection so that similarly-progressed samples can be compared.

# *E. muscae* Berkeley infection and host immune response

The entomopathogen community has believed that *E. muscae* evades the host response by growing protoplastically (i.e. without a cell wall, components of which would be recognized and targeted by the host immune system). In both the gypsy moth and the greater wax moth, it has been shown that the host immune cells recognize walled *Entomophaga* fungal cells, but there is little cellular response to protoplasts [31,32]. Based on these findings, it has been posited that the host does not detect the ever-increasing fungal mass within until the end of infection when the fungus puts on a cell wall that contains epitopes that the host can recognize [29,30]. As a result of ostensibly evading the immune system, it has also been hypothesized that *E. muscae* does not generate toxins, as it would have no incentive to do so in the absence of attack by the host [29].

Our data show that there is a robust initial response to *E. muscae* Berkeley exposure. Many of the immune genes that are induced with *E. muscae* Berkeley have also been observed to be induced by exposure to other, more generalist fungal pathogens (e.g. *Beauveria bassiana*, *Metarhizium anisopliae* [33,34]). These data clearly indicate that the host detects an invader early on in infection. Furthermore, there is a detectable immune response through the length of infection (Fig S8), though at this point we cannot say if this response is a slow disengagement of the initial response or stimulated *de novo* by the growing fungus.

Interestingly, the living animals sampled at 96 hours for RNAseq are inconsistent in their host transcriptional immune response: two of the three animals more closely resemble control animals than infected animals in host transcription (Figure 4C). At least two scenarios could explain this observation. It is possible that both of these animals were in the process of recovering from infection (i.e. the immune system was effectively combatting the fungus) or there was a delay in the course of infection compared to contemporaneous samples. The proportion of fungal reads present in these samples is lower than what would be expected for late time points, which is consistent with either scenario. At this point we simply do not know if every instance of a spore hitting a fly leads to a productive fungal infection. There is some



evidence to the contrary: we have consistently observed that some highly-exposed flies die prematurely. These animals are generally smaller than others in the vial and are often covered in spores. This could indicate that getting hit by too many spores (an unlikely outcome in the natural world) leads to an overwhelmed fly (e.g. overactive immune system or accelerated fungal growth) that dies before being manipulated. These flies do not sporulate, though it is possible that they do produce resting spores. On the other hand, we have observed that survival of exposed flies is substantially increased when flies are exposed to small quantities of anti-fungal. This indicates that there are ways of either halting or slowing an infection, though whether the fly's immune system is generally capable of doing this is unknown.

Though five of our six cadavers sampled for transcriptomics have similar levels of immune gene transcripts compared to *E. muscae Berkeley*-exposed animals sampled at 72 hours, the sixth cadaver exhibits higher expression of anti-fungal peptides Drosomycin and Metchkinowin, the beta-glucan receptor GGBP3-like and several IM family genes. It is possible that this fly is demonstrating the proposed immune-system overload and resultant spike in immune system gene expression [29]. It might be the case that this immune spike occurs in all animals; we could have sampled too late to observe it in the other five samples but were able to see it in one sample that was late to respond. However, one can imagine that in the presence of copious fungal epitopes the fly immune system would continue to go be highly engaged until death, not drop back down to levels comparable to earlier time points (i.e. 72 hours), as seen in the majority of sampled cadavers. At present, we are inclined to interpret this odd-sample-out as a fluke rather than an indication of a moribund immune spike.

#### Why is *E. muscae Berkeley* in the brain?

Our work demonstrated that *E. muscae Berkeley* is present in the nervous system system relatively early in infection, just 48 hours following exposure. *E. muscae Berkeley*'s invasion of the nervous system grants the fungus direct access to host neurons and may be mechanistically important for achieving behavioral manipulation of the host fly. However, we should be careful to consider any and all possible ways *E. muscae Berkeley* could alter host behavior before jumping to this conclusion.

We can imagine four general mechanisms by which *E. muscae* is able to achieve behavioral manipulation. The fungus could invade the nervous system in order to localize adjacent to and impinge on the activity of particular neurons through chemical or physical means. However, we are skeptical that this is the case as our observations do not support specific localization of the fungus in the CNS.

A second possibility is that the fungus invades the nervous system in order to gain access to either a particular group or groups of neurons or all neurons generally, but does not localize within the CNS in a stereotyped manner. Rather it is sufficient that it has crossed the blood brain barrier, which insulates the nervous system from the activities in the hemolymph and allows for the selective transport of compounds

to and from the hemolymph, allowing the fungus to modulate the activity of neurons by secreting compounds that diffuse throughout the CNS. The secreted compounds could be specific, only altering the activity of a subset of susceptible neurons, or could be more general, changing activity over many or all neurons.

A third possibility is that the fungus does not need to invade the nervous system in order to change the host's behavior. The fungus could be secreting a compound into a hemolymph that is capable of crossing the blood brain barrier and altering neuronal activity. Alternatively, the fungus could be secreting a compound into the hemolymph that changes the host's internal state (either directly or by leading the host to respond in a way that causes the internal state to change) which leads the animal to respond by executing one or more of the end-of-life behaviors.

Lastly, it's possible that the fungus does not secrete compounds to induce these behaviors, but by destroying fly tissues elicits the series of observed behaviors. While we believe this last scenario to be highly unlikely, it cannot yet be ruled out.

For these last two proposed mechanisms, the fungus would not need to invade the CNS in order to affect behavior. In these cases, the fungus could be invading the CNS as a means of escaping immune surveillance. By establishing a reservoir in the CNS, the fungus could replenish dying cells in the hemolymph in order to ensure that the infection took hold. Alternatively, the fungus could invade the CNS because it provides a rich, nutritive substrate to sustain the fungus. This scenario is inconsistent with our histological data both from flies that are not executing end-of-life behaviors (Figure 5) and flies that are executing end-of-life behaviors show that the brain is largely intact, indicating that the fungus abstains from consuming these tissues until host death.

Our observation that *E. muscae Berkeley* invades the host nervous system contrasts with the recent report that *Ophiocordyceps unilateralis*, a fungal pathogen that induces very similar end-of-life phenotypes in the ant host *Camponotus castaneus* is absent from the brain at the point of behavioral manipulation [35]. Interestingly, another Entomophthoralean fungus, *Strongwellsea magna*, is also known to invade the nervous system of its lesser house fly host (*Fannia canicularis*) during infection [36]. In this case, the author proposed that this did not have consequences for behavior.

Surprisingly, transcriptomic analysis of dissected brains from exposed females at 24, 48 and 72 hours with confirmed *E. muscae Berkeley* infections failed to show differential gene expression compared to uninfected controls but did show an increase in *E. muscae Berkeley* titer (taking *E. muscae Berkeley* reads as a proxy) (Fig S9). Though these samples were not collected at the point of behavioral manipulation by the fungus, it is surprising that there are no major transcriptional changes within the brain at these time points, and suggests that behavioral modification may be largely independent of transcriptional changes in the brain.



# Behavior and beyond: the utility of the *E. muscae* Berkeley-*D. melanogaster* system

The past decade has seen an explosion of tools for characterizing and manipulating the nervous system of *D. melanogaster*, including a catalog of the types and corresponding expression patterns of its approximately 100,000 neurons, a complete map of connections in the brain, reagents for conditionally activating or disabling specific sets of neurons as well as purifying these cells, and methods for automatically tracking and classifying behaviors in populations. Our development of a robust system of microbially induced behavior manipulation in *D. melanogaster* will allow us, and we hope many others, to leverage the powerful molecular and neurobiological toolkit of *D. melanogaster* to explore the molecular basis of this fascinating but still mysterious biological phenomenon.

## **Acknowledgements**

This research was supported by the MBE's Investigator Award from the Howard Hughes Medical Institute and CE's Graduate Research Fellowship from the National Science Foundation. This work used the Vincent J. Coates Genomics Sequencing Laboratory at UC Berkeley, supported by NIH S10 OD018174 Instrumentation Grant. The authors are grateful to Richard Humber whose expertise in all things *Entomophthora*, and his eagerness to educate us, was invaluable throughout, Michael Vahey and Brian Belardi in Dan Fletcher's group for assistance with high-speed videography, Ciera Martinez for developing a protocol to embed and section flies in paraffin, Steve Ruzin and Denise Schneides at the Berkeley Imaging Facility (College of Natural Resources, UC Berkeley) for their expertise and patience in microtomy and all things microscopy, Jen-Yi Lee for her guidance in using equipment in the Molecular Imaging Center (College of Natural Resources, UC Berkeley), Kristin Scott, Russell Vance, Damian Elias and Richard Calendar for advice, feedback and support during this project, William Ludington for his reminder that "fruit flies like a banana", and Michael Bronski for introducing the Eisen Lab to the wonderful world of entomopathogens. CE also acknowledges the support of Nora, Bruce and Kevin.

## **Author Contributions**

CE discovered *Drosophila* infected with *Entomophthora* in her backyard, figured out how to reliably passage the infection to lab-reared flies, carried out all of the experiments described in this paper, made all the figures and wrote the manuscript. TCL and QES helped maintain populations of infected flies for experiments and provided experimental assistance, and HM assisted with the early characterization of the

*Entomophthora* infection. MBE encouraged the pursuit of this project by CE, obtained funding for the research, provided feedback and ideas throughout, and edited and advised on figures and the manuscript.

## Funding

All of the research described in this paper was funded by an HHMI Investigator award to MBE. CE was supported by a National Science Foundation Graduate Research Fellowship.

## Materials and Methods

### Fly husbandry

Healthy wild-type, CantonS Wolbachia-free (WF) *D. melanogaster* were reared on Koshland diet (0.68% agar, 6.68% cornmeal, 2.7% yeast, 1.6% sucrose, 0.75% sodium tartrate tetrahydrate, 5.6 mM CaCl<sub>2</sub>, 8.2% molasses, 0.09% tegosept, 0.77% ethanol, 0.46% propionic acid) supplemented with activated dry yeast pellets (Red Star) at 21°C on a 12:12 light:dark photoperiod. Any time the photoperiod needed to be adjusted, flies were reared from third instar or earlier on the desired photoperiod to ensure that emerging adults were properly entrained.

### Fendel tending

Wild fruit flies were caught by directly aspirating from an uncovered plastic dishwashing pan (aka the “fendel”) that was baited with quartered organic watermelon and an assortment of other organic fruits. Aspirated flies were transferred onto Koshland diet and housed at ambient temperature and ambient humidity. Baiting and capture was performed in the spring through early fall of 2015 at a personal residence in Berkeley, CA.

### PCR genotyping

DNA was extracted from individual cadavers or 1.5 mL of *in vitro* culture using the QIAamp Micro Kit (QIAGEN) following the tissue protocol. These DNA preparations were used to amplify the desired sequences. *Entomophthora*-specific ITS primers (emITS: emITS-1 5'- TGGTAGAGAATGATGGCTGTTG-3', emITS-4 5'- GCCTCTATGCCTAATTGCCTTT-3') or fungal-specific large subunit primers (LSU: LR3-1 5'- GGTCCGTGTTTCAAGAC-3', LR0R-4 5'- GTACCCGCTGAACTTAAGC-3') were used to genotype *Entomophthora* (James et al 2006); cytochrome oxidase II primers (tLEU: 5' ATGGCAGATTAGTGCAATGG 3' and tLYS: 5'

GTCTAAGAGACCAGTACTTG 3') were used to genotype infected *Drosophila* hosts (Liu and Beckenbach (1992). Each reaction was performed using GoTaq 2x colorless mastermix (Promega) with 800 nM of each forward and reverse primer with the following thermocycling conditions: 95C for 5 min followed by 35 iterations of 95C for 30 seconds, 51C for 30 seconds then 72C for 1 min/kb then 72C for an additional 10 minutes. Reactions were checked by gel electrophoresis in 1% agarose. Successful reactions were prepared for sequencing using ExoSap-IT (Affymetrix) per manufacturer's instructions and submitted with each amplification primer for Sanger sequencing. Assembly of forward and reverse reads was attempted to generate a consensus sequence using Seqman Pro (DNA Lasergene v.10). Sequences were searched against the BLAST NT database using blastn.

#### Isolating *E. muscae* Berkeley in vitro

To grow *E. muscae* Berkeley in vitro, first spores were collected using the ascending conidia collection method (i.e. by placing a fresh cadaver in the bottom of a sterile petri dish and allowing the cadaver to sporulate overnight) (144). The following morning, the lid of the dish was rinsed with 10 mL of Grace's insect medium (1x) supplemented with L-glutamine, 3.33g/L lactalbumin hydrolysate, 3.33g/L yeastolate (ThermoFisher Scientific # 11605- 094) containing 5% fetal bovine serum (Invitrogen) and transferred to a vented, treated T25 tissue culture flask (Corning # 10-126-10) using sterile technique. The culture was then incubated at room temperature in the dark until growth was apparent (non- homogenous white spheres floating in the medium). The culture was genotyped with emITS and LSU primers to confirm that it was *E. muscae* and was an identical match to the cadaver that produced the spores which started the culture ("Fendel mama") at these loci. The culture was periodically examined at 100-400x on a compound microscope to confirm proper morphology and absence of contamination.

#### Isolating and optimizing in vivo *E. muscae* Berkeley infection

Wild fruit flies sampled from the fendel and housed on Koshland food were monitored nightly for two weeks after capture for deaths due to *E. muscae* Berkeley. Freshly killed cadavers were separated from their living conspecifics by briefly anesthetizing live flies via cold anesthesia (incubating 2-3 minutes in a residential freezer). Fresh cadavers (anywhere from 1-10, depending on availability) were placed on chunks of organic banana in a wide Drososial with kimwipes to sop up excess moisture. Approximately 50 healthy flies were then transferred onto the prepared vial by flipping (no anesthesia was used). The plug of the vial was pushed down to confine the flies within a few centimeters to improve the likelihood that they would encounter flying spores. Leaving the exposed flies with the spent cadavers was initially problematic as we were working without access to anesthesia or a microscope and had to identify new cadavers by naked eye. Additionally, the raw banana began to ferment and break down, leading to excess moisture which was

prematurely killing some of our exposed flies. To avoid these issues, the exposed flies were transferred to a new banana/kimwipe vial after the first 48 hours. This was done by allowing the living flies to climb into an empty “holding” vial then flipping them onto the fresh vial. The flies were monitored daily for deaths; cadavers were removed after allowing healthy flies to climb into a “holding” vial and used to start new exposure vials.

# *In vivo* propagation of *E. muscae* Berkeley infection

Cadavers are collected daily 2-5 hours after the end of the 12 hour light cycle from exposure vials that are between 96 and 168 hours (4 and 7 days) old. All flies that will die on this day because of *E. muscae* Berkeley infection will be dead by this time and will be extremely swollen with fungal growth, making them obvious among the living flies. CO<sub>2</sub> is used to anesthetize the living flies in exposure vials and collect cadavers, which are placed in a petri dish with a piece of Whatman paper wetted with DI water to mitigate static. Molten cadaver embedding medium is preparing by microwaving solidified AS solution (1.5% agar, 10% sucrose) and poured into a clean 100 x 15 mm petri dish just enough to cover the bottom of the dish. As soon as the agar has set, six cadavers are embedded head first in a circle of diameter <2 cm with their wings on the outside of the circle. The wings are pressed into the agar to ensure they do not intercept any launched conidia. The agar is allowed to completely set before continuing. The cadaver circle is cut out from the set agar by using an empty, wide-mouth *Drosophila* vial (FlyStuff). The agar disc containing the fly circle is then transferred, cadaver-side up, into an empty, wide-mouth *Drosophila* vial. A ruler is used to mark 2 cm above the surface of the agar. CantonS flies reared on the same 12 hour light cycle on Koshland medium are collected from eclosing vials using CO<sub>2</sub> anesthesia. Fifty healthy flies are added to the vial container the agar disc with cadavers and tapped down until all flies are under the 2 cm mark. A Droso-plug (FlyStuff) is pushed into the vial such that its bottom is flush with the 2 cm mark. The vials is incubated for the first 24 hours at 18C in a humid chamber (~95% humidity, 2L plastic beaker lined at the bottom with wetted paper towels or kimwipes and covered with foil), to encourage sporulation. After 24 hours, the Droso-flug is lifted to relieve the confinement of the flies and the vial is moved to a 21C incubator (~60% humidity). After 48 hours, the exposed flies are transferred onto GB+ medium (40% organic banana [w/v], 2% agar, 0.3% propionic acid) without anesthesia; incubation continues at 21C. Cadavers are collected daily 2-45 hours after the end of the 12 hour light cycle from exposure vials that are between 96 and 168 hours (4 and 7 days) old. The process is repeated daily to supply cadavers for experiments and ensure the infection is maintained.

# Photography and videography

Pictures and videos of dead and dying flies (extending probosces and raising wings) were taken with a Nexus 5x (Google) or iPod Touch (Apple) aided by attaching a macrolens (Luxsure) to the device camera lens or by aligning the device camera lens with the eyepiece of a dissecting scope. Images were taken under ambient light, humidity and temperature.

Time lapse microscopy was taken via a USB microscope (DinoLite Digital Microscope Pro) using DinoLite software v1.12 (Figure 3A) or on a Nikon 80i compound microscope equipped with a Hamamatsu black and white camera (C11440) using MetaMorph software (v. 7.8.00, Molecular Devices) (Figure 3B,C). Each time lapse consists of images collected once a minute for the indicated duration. Images were taken under ambient temperature and humidity.

High-speed videos (18,000-54,000 fps) were filmed with a 5x objective on a Axiovert 200 microscope (Zeiss) equipped with an Photron Fastcam 1024PCI. Cadavers were mounted in 1.5% agar on a glass slide and arranged such that forming conidiophores and conidia were visible (for spore ejection) or such that cadavers sporulated onto a #1 glass coverslip in the plane of the camera (for spore landing). Video was captured via Photron Fastcam Viewer software, running at the indicated frames per second in end trigger mode (new frames were continually captured and old frames dumped until the user triggered the filming to stop). Spores or landing sites were manually watched until a spore disappeared or appeared, then video was stopped and last ~10 seconds of footage were manually searched for the spore launching or landing event.

# Circadian timing of death

CantonS WF flies were reared on a 12:12 light cycle (photophase 1 am – 1 pm or 7 pm - 7 am PDT, as indicated). For experiments run in complete darkness, 25 flies were exposed to *E. muscae* Berkeley via the standard anesthesia-dependent protocol. All exposure vials were set up before the utilized cadavers sporulated (within 2 hours of the light-dark transition). Exposure vials were housed in a humid chamber in a dark 21C incubator wrapped in blackout cloth for approximately 24 hours before loading into *Drosophila* activity monitors (DAMs, Trikinetics). Before loading flies, DAM tubes (5 mm x 65 mm, polycarbonate) were prepared containing such that one end of the tube held approximately one cm of 1.5% agar, 10% sucrose and was wrapped in parafilm to prevent drying out.

To load the flies, all accessible light sources were disabled before removing the humid chamber from 21C and placing on the bench at RT. Vials of flies were kept under a foil-lined box as they waited to be processed. One vial at a time was retrieved from the box, knocked out with CO2 under a dissecting scope whose LED light ring was covered with a red gel filter (Neewer), sorted by sex and loaded into individual DAM tubes with the aid of a red LED flashlight (KMD Aero) before capping each tube with an autoclaved cotton plug. For each vial, eight females and eight males were chosen for loading into DAM vials.

Unexposed flies (i.e. controls) were always processed before proceeding to exposed flies. CO2 pad was wiped down with 70% ethanol between vial types to prevent cross-contamination. DAMs were loaded from bottom to top row, filling a row and securing each tube with rubber bands before proceeding to the next. Loaded tubes were kept under a foil-lined box to prevent light exposure. When all loading was finished, DAMs were covered with blackout cloth and transported back to the 21C incubator. There they were attached to the DAM interface unit and recording began, binning counts in 30 second intervals. Recording continued for ~170 hours until the experiment was stopped.

Like with loading, experiments were stopped by first disabling all light sources, then carefully disconnecting and removing DAMs from the 21C incubator to not disturb adjacent experiments, and sealing incubator before turning on the overhead lights for manual inspection. Each DAM tube was inspected to see if the fly was dead or alive. If dead, the tube was inspected for evidence of sporulation to determine if the cause of death was patent *E. muscae* infection. For experiment run on a 12:12 light cycle, flies were exposed as above but without concern for light contamination; resultant DAMs were housed on a 12:12 light cycle for the duration of the experiment. Each channel was checked daily following sundown to see which flies had died within the previous 24 hours.

DAM data were processed using Python to determine time of last movement (accurate to 30 seconds) and to plot movements over time. For each channel, the reported time of last movement was manually cross-checked using the plot of activity data. In cases where there was an erroneous movement (i.e. a signal occurring more than 24 hours after the fly's last movement), the time of last death was manually re-assigned. For data visualization, data were binned into 15-30 minute intervals and the average movements of unexposed animals (controls), exposed or entrained light cycle of exposed flies and cadavers and the time of last movement for each observed cadaver were plotted in Prism (GraphPad). There were generally no obvious differences between male and female activity for the unexposed animals so sexes were combined for data analysis.

# Collection and staining of primary conidia

Three to six fresh cadavers (i.e. those who had not yet sporulated) were collected from exposure vials using the anesthesia dependent methods detailed above. Sporulation chambers were prepared as follows: a small piece of Whatman paper was placed in the base of a small petri dish (60 mm x 15 mm) and wetted with DI water. A bloated cadaver was chosen for each chamber and its wings were removed. The cadaver was placed in the middle of the Whatman paper and the chamber was topped with a custom, 3D-printed top that included a square opening slightly smaller than a standard 22x22 mm coverslip. The top and bottom were sealed using parafilm and a new coverslip was placed over the opening. Cadavers were left in the chambers at room temperature to sporulate. Coverslips were changed every 30 minutes to 1 hour, as needed, and



promptly stained for microscopy by applying Hoechst (1 ug/mL). Spores were imaged on a compound microscope at 40x for measuring conidia attributes; exact distances were determined by calibration with a 0.01 mm micrometer (OMAX). For each attribute (number of conidia, length and width of conidia, diameter of nuclei), at least 50 different primary conidia were counted from three different cadavers.

# RNA experiments

RNA was prepared from each thawed sample by homogenizing with an RNase-free pestle (Kimble Chase), washing the pestle with 750 uL Trizol, then proceeding using the manufacturer's protocol. For reverse-transcription PCR (RT-PCR) and transcriptomic experiments, three mock vials and three Three mock vials and three exposure vials were started with 25 CantonS WF flies 0-1 days old (RT-PCR, whole flies) or 1-2 days old (dissected brains) with either 0 (mock) or 6 (exposure) cadavers embedded in AS. Flies were incubated for the first 24 hours at 18C confined to 2 cm with cadavers, then moved to 21C where the confinement was relieved. Flies were transferred to GB+ at 48 hours where they continued to be housed at 21C. (Vials were sampled every 24 hours for 72 (dissected brains), 96 (RT-PCR) or 120 (whole flies) hours by anesthetizing the entire vial with CO2. Exposed animals were preferentially selected based on evidence of contact with fungus (e.g. spores or melanization responses thereto visible on cuticle). Sampling for each time point consistently occurring between 2-3 hours following the light-dark transition. Before sampling, all equipment used to manipulate flies (e.g. CO2 pad, forceps etc.) were treated with 10% bleach, wiped with DI water then sprayed with 70% ethanol. All materials that handled flies (CO2 gun, pad, forceps) were treated with 10% bleach and rinsed with DI water between sampling exposure vials. Control vials were always sampled first. Sampled material (either whole fly or dissect brain) was immersed in 250 uL Trizol then immediately flash frozen with liquid nitrogen. Samples were stored at -80C until extraction.

# RT-PCR

One control female (24-96 hours) and two infected females (24-72 hours) or one fresh cadaver (96 hours) from each vial were collected as described above. RNA was prepared from each thawed sample by homogenizing with an RNase-free pestle (Kimble Chase), washing the pestle with 750 uL Trizol, then proceeding using the manufacturer's protocol. RNA was then treated with Turbo DNase (ThermoScientific) per the manufacturer's protocol and quantified using a Qubit Fluorometer (Qubit RNA HS assay kit, ThermoFisher Scientific). For each sample, 1 µL or 160 ng of DNase-treated RNA, whichever was more, was added to a new, nonstick tube and mixed with two pmol primer emITS1, 770 nM dNTPs in a final volume of 13 µL. The reaction was incubated at 65C for 5 minutes then incubated on ice for at least 1 minute before proceeding. To the mixture was added 5x First Strand Buffer (1x final, ThermoFisher Scientific), 100 mM DTT (5 mM final, ThermoFisher Scientific), 1 uL RNaseOUT (ThermoFisher



Scientific) then 200 units of SuperScript III RT (ThermoFisher Scientific). After thorough mixing, each tube was incubated at 55C for 60 minutes to reverse transcribe then 70C for 15 minutes to heat kill the transcriptase. To amplify *E.muscae*-specific cDNA, 2 uL of the reverse transcription reaction was mixed with GoTaq 2x colorless mastermix (1x final, Promega) and 500 nM each primers emITS1 and emITS4 (5'- GCCTCTATGCCTAATTGCCTTT-3') then run on a thermocycler with the following settings: 95C for 5 min followed by 35 iterations of 95C for 30 seconds, 61C for 30 seconds then 72C for 30 seconds then 72C for an additional 10 minutes. Four µL of each reaction was analyzed by gel electrophoresis in 1% agarose.

# Whole fly *in vivo* RNAseq time course

One control female (24-120 hours) and two infected females (24-72 hours), one infected female and one cadaver (96 hours) or one cadaver (120 hours) from each vial were collected as described above. RNA was prepared from each thawed sample by homogenizing with an RNase-free pestle (Kimble Chase), washing the pestle with 750 uL Trizol, then proceeding using the manufacturer's protocol. RNA was quantified using a Qubit Fluorometer (Qubit RNA HS assay kit, ThermoFisher Scientific) and quality was checked by running on a RNA 6000 Pico chip on a Bioanalyzer 2100 (Agilent Technologies). High quality RNA was then treated with Turbo DNase (ThermoScientific) per the manufacturer's protocol. RNAseq libraries were prepared with the TruSeq RNA v2 kit (Illumina) using 500 ng of input RNA per sample. Samples were multiplexed 21 samples to a lane and sequenced using 100 bp paired-end reads on a HiSeq 4000 at the QB3 Vincent J. Coates Genomic Sequencing Facility at UC Berkeley.

# Dissected brain RNAseq

Brains were individually dissected and sampled from first three control and then three exposed females. Each animal was dissected in sterile 1x PBS in its own disposable dissection chamber (35mm petri dish lined with 2-3% agar) and dissecting forceps were treated with 3.5% hydrogen peroxide then rinsed with sterile water between samples to prevent nucleic acid carryover. The body of each animal was saved and subjected to a DNA extraction using the manufacturer's provided protocol for the isolation of genomic DNA from tissues (QIAamp DNA Micro kit, QIAGEN) eluting in 20 µL of buffer AE. For each fly body, 1 µL was used to template a PCR reaction consisting of 12.5 µL GoTaq, 2 µL of each primer emITS1 and emITS4 (10 µM stocks), and 7.5 µL water for a final volume of 25 µL. Reactions were cycled with the following conditions: 95C for 5 minutes followed by 35 cycles of 95C for 30 seconds, 51C for 30 seconds and 72C for 1 minute, then a final 10 minute extension at 72C. Reactions were analyzed via gel electrophoresis to confirm that all exposed animals had come into contact with *E. muscae* Berkeley and that control animals were uninfected.

RNA was prepared from each thawed sample by homogenizing with an RNase-free pestle (Kimble Chase), washing the pestle with 750 uL Trizol, then proceeding using the manufacturer's protocol. RNA was quantified using a Qubit Fluorometer (Qubit RNA HS assay kit, ThermoFisher Scientific) and quality was checked by running on a RNA 6000 Pico chip on a Bioanalyzer 2100 (Agilent Technologies). One replicate control RNA sample for the 48 hour time point was lost prior to library preparation so was omitted. High quality RNA was then treated with Turbo DNase (ThermoScientific) per the manufacturer's protocol. RNAseq libraries were prepared with the TruSeq RNA v2 kit (Illumina) using all of the extracted RNA for each brain, 17-75 ng of input RNA per sample. Samples were multiplexed 17 samples to a lane in equimolar amounts and sequenced using 100 bp paired-end reads on a HiSeq 4000 at the QB3 Vincent J. Coates Genomic Sequencing Facility at UC Berkeley.

### *E. muscae* reference transcriptome assembly

An initial reference (Emus-Ref1) was assembled from reads from exposed *in vivo* time course samples that had first failed to align as pairs to the *D. melanogaster* transcriptome (r6.11, HiSat2) then failed to align as singletons to the *D. melanogaster* genome (r6.11, bowtie2) using TRINITY with the developer's recommended settings [37]. After assembly, all *in vivo* time course reads were aligned to Emus-Ref1 to assess contamination of non-*E. muscae* sequences. All Emus-Ref1 transcripts were searched using blastn for homology (evaluate 1e-50 or smaller) to organisms not annotated as fungi or virus. These transcripts were removed to generate Emus-Ref2. All *in vivo* time course reads were aligned to Emus-Ref2 to assess contamination of non-*E. muscae* sequences. Transcripts that were not expressed by any sample (TPM = 0) or where TPM of uninfected samples accounted for more than 10% of TPM summed across all samples were removed to generate Emus-Ref3. Transcriptome completeness was estimated by BUSCO v1.1 analysis using the fungal reference set (1438 BUSCOs).

### RNAseq data analysis

To calculate gene expression, reads were pseudo-aligned to the appropriate reference (dmelDBG6.rel85 for *D. melanogaster* or Emus-Ref3 for *E. muscae*) and transcript abundance was estimated using Kallisto [38]. Data were analyzed using hierarchical clustering by gene (Cluster 3.0), ANOVA between grouped treatments (scipy.stats) and GO term analysis (Panther [39]). Hierarchical clustering heatmaps were generated in Java TreeView; other data were plotted in matplotlib (Python), Prism (GraphPad) or Excel 2013 (Microsoft).

### Paraffin embedding and microtomy of whole flies

Two mock and two exposure vials were started daily for seven days each with 50 CantonS WF flies 0-1 days old with either 0 (mock) or 6 (exposure) cadavers embedded in AS. Flies were incubated for the first 24 hours at 18C confined to 2 cm with cadavers, then moved to 21C where the confinement was relieved. Flies were transferred to GB+ at 48 hours where they continued to be housed at 21C. Vials were sampled every 24 hours via CO2 anesthesia then infiltrated and embedded in paraffin. For detailed protocol, see <https://www.protocols.io/u/carolyn-elya>. Briefly, flies were fixed 24-36 in ice-cold Carnoy's (6:3:1 ethanol:chloroform:glacial acetic acid) at 4C. Samples were next dehydrated by stepping through a series of increasing ethanol concentrations. Samples were then transitioned into Histoclear (National Diagnostic) before slowly introducing Paraplast (Sigma). Samples were infiltrated with Paraplast for at least 84 hours at 60C with gentle shaking before embedding in base molds with embedding rings (Thermo Scientific) and drying overnight. Samples were stored at room temperature until they were sectioned at 8 µm with an RM2255 microtome (Leica), applied to Polysine slides (ThermoFisher Scientific) and dried overnight at 42C. Sections were stored at room temperature for up to three weeks before Safranin O/Fast Green FCF staining or up to one week before fluorescence in situ hybridization (FISH).

#### Safranin O/Fast Green FCF staining of paraffin sections

Slide-mounted sections were dewaxed with two, 10 minute changes of Histoclear then rehydrated to 70% ethanol with a decreasing ethanol series. Sections were then stained one-at-a-time following Johansen's Safranin and Fast Green protocol [40] then checked under a dissecting scope before mounting in DEPEX mounting medium (Electron Microscope Sciences) and drying overnight. Slides were imaged using a 20x objective with the Axio Scan.Z1 (Zeiss).

#### Fluorescent *in situ* hybridization (FISH) of paraffin sections

Slide-mounted sections were dewaxed with two, 10 minute changes of Histoclear then rehydrated to 70% ethanol with a decreasing ethanol series. Slides were incubated in 0.2 M HCl at 37C for 45-60 minutes and rinsed in DI water before applying 80 µL of hybridization solution (20 mM Tris-HCl pH 8.0, 0.9 M NaCl, 0.01% sodium dodecyl sulphate, 30% formamide) containing 100 pmol/µL of an *E. muscae* Berkeley-specific DNA probe (AlexaFluor633-5'-TGCTAAAACAGCACAGTT-3', ThermoFisher Scientific). Slides were incubated overnight in a humid chamber at room temperature. The following day, slides were briefly washed in 1x PBS with 0.3% Triton-X100, rinsed in 1x PBS and mounted in ProLong Gold with DAPI (ThermoFisher Scientific). Slides were cured for 24 hours before imaging on a LSM 800 confocal microscope (Zeiss) with 5x-40x air objectives.

# Supporting Information

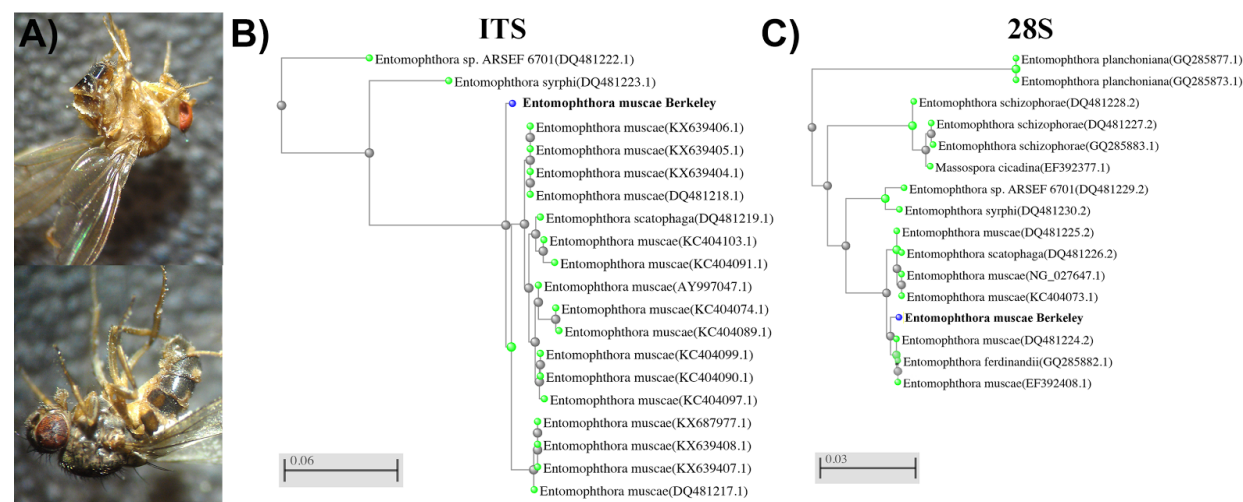

**Figure S1. Discovery of *E. muscae* Berkeley.** A) *E. muscae* Berkeley-killed cadavers discovered in bait on July 25, 2015. Note remnants of fungal growth through the intersegmental membrane of dorsal abdomen (above and below) and spores deposited on wings (above and below) and legs (below). B,C) BLAST (blastn) results as trees (fast minimum evolution) for B) consensus *E. muscae* Berkeley ITS (13 sequences) and C) *E. muscae* Berkeley 28S (11 sequences). Gray legend bars show difference in percent identity between sequences.

951   
952 **Figure S2. Confirmation that *E. muscae* Berkeley is growing *in vitro*.** A) Alignment of ITS region from  
953 *in vitro* culture (iv\_culture) and consensus ITS sequence from fendel cadavers (fendel). B) Same as A, but  
954 for LSU region.

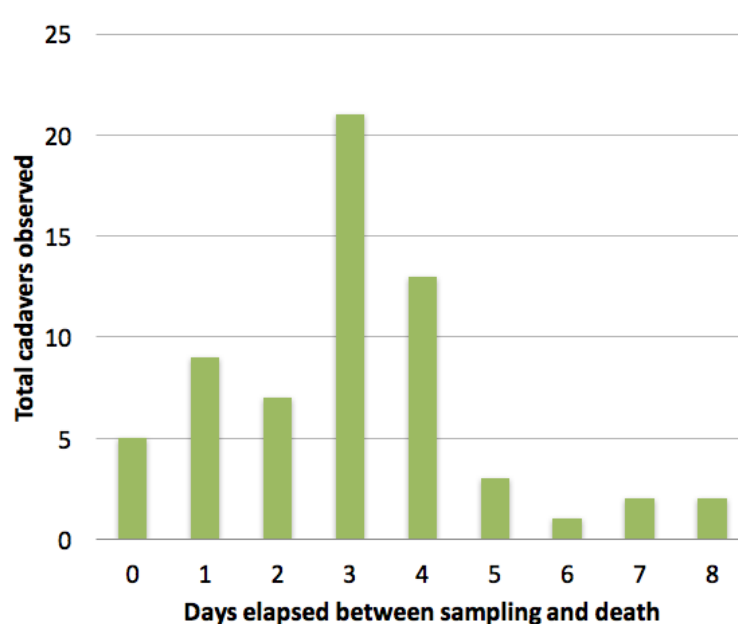

**Figure S3. Time between capture of wild *Drosophila* and death by *E. muscae* infection when housed on Koshland diet.** Flies were housed at ambient temperature and humidity in a second-story apartment during August and September 2015 in Berkeley, CA. A total of 63 cadavers of wild *Drosophila* were observed out of approximately 900 flies aspirated and monitored during this time.



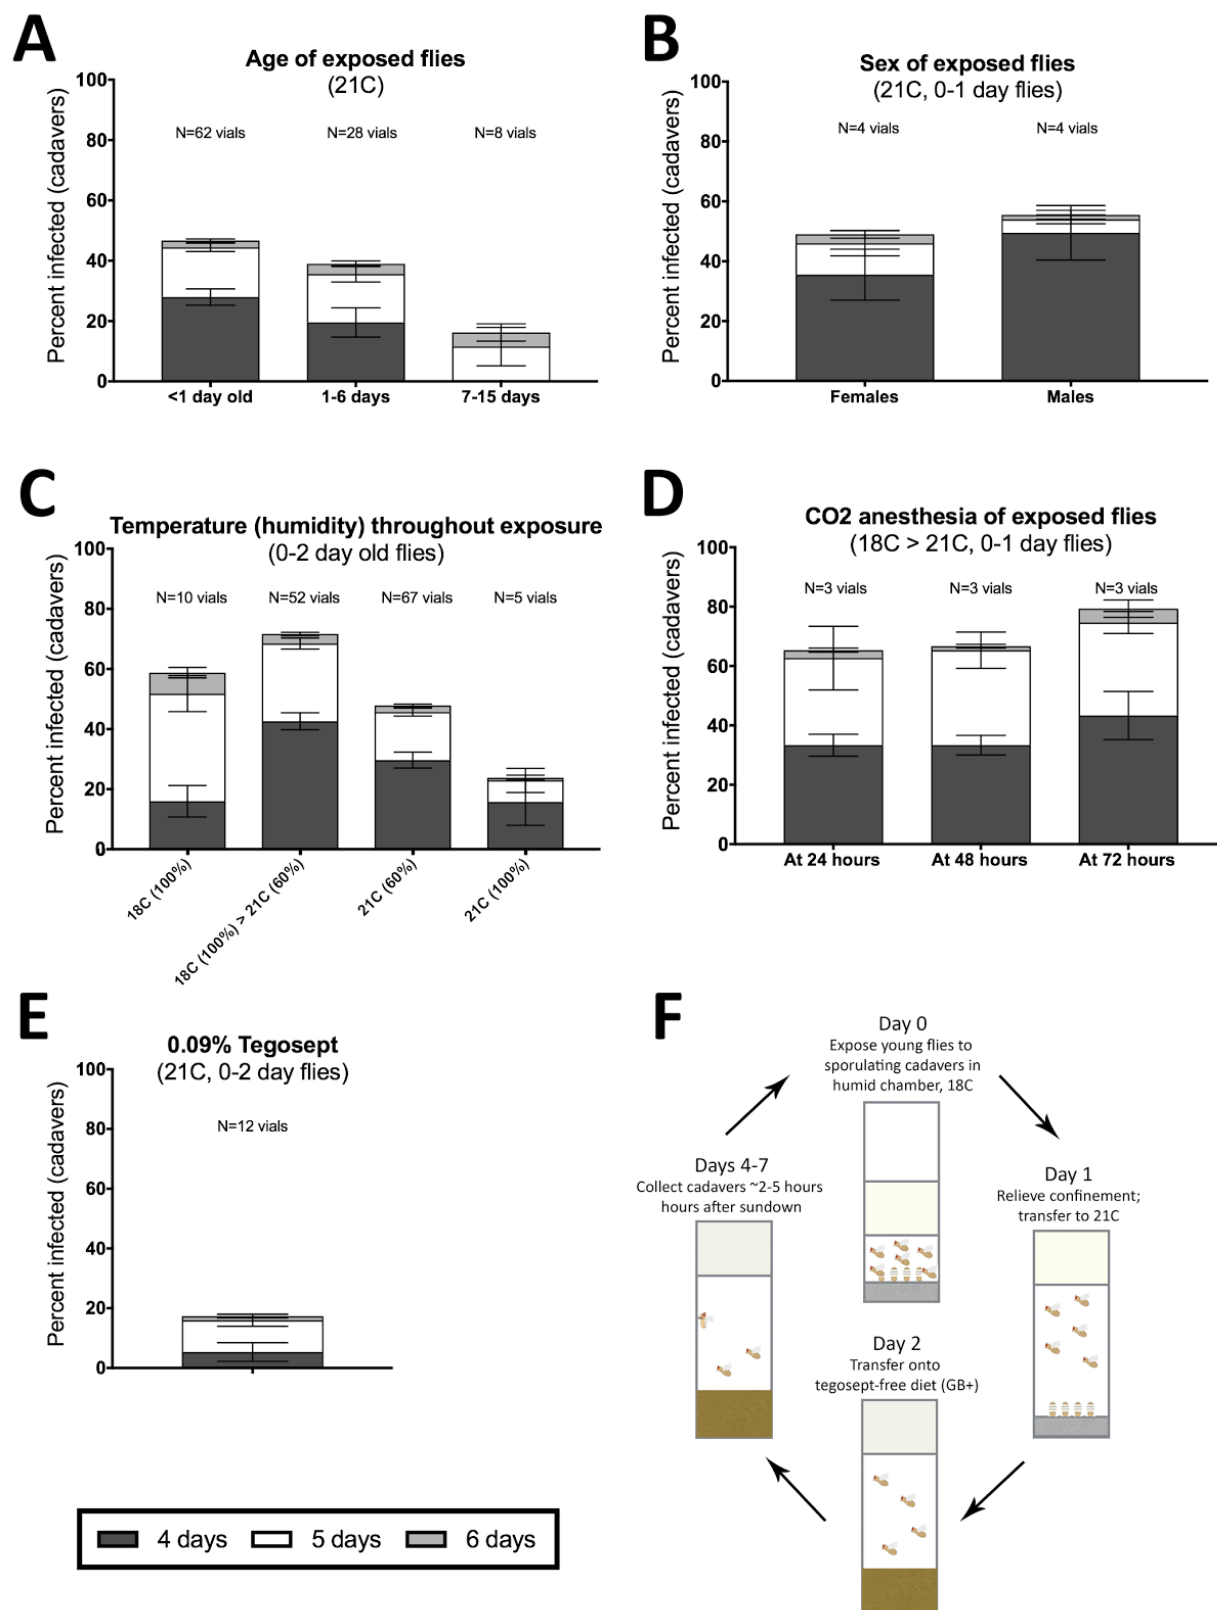

**Figure S4. Optimization of *in vivo* *E. muscae* infection of CantonS WF *D. melanogaster* under laboratory conditions.** A-E) Percentage of infected cadavers at 96 hours (4 days), 120 hours (5 days) or 144 hours (6 days) after exposure to *E. muscae* Berkeley upon varying A) age; B) sex; C) temperature and humidity; D) CO<sub>2</sub> anesthesia for 20 minutes at the indicated post-exposure time or E) housing on 0.09% tegosept for 120 hours beginning 48 hours after exposure. 18C > 21C indicates that vials were incubated 24 hours at 18C, 100% humidity then transferred to 21C, ~60% humidity. If no percent is indicated, then humidity was ~60%. All vials used 4-6 cadavers to establish infection and were set up using the anesthesia-independent protocol. Replicate vials for each condition are shown above the graph. For all panels each vial contained 50 flies. F) Summary of method for *in vivo* propagation of *E. muscae* in CantonS WF *D. melanogaster*. Briefly, 50 healthy, young (eclosed within the last 24 hours) CantonS flies of mixed sex are confined within 2 cm of a circle of 6 cadavers embedded head-first in sucrose agar. Vials are incubated 24 hours at 18C and ~100% humidity. On Day 1 (24 hours since exposure) the vial plugs are raised to the top of the vial and incubation continues for the next 24 hours at 21C with ~60% humidity. On Day 2 (48 hours since exposure), flies are moved away from cadavers and onto GB+ diet. From Days 3-7 (96 to 168 hours since exposure), vials are monitored 2-5 hours following “sundown” to collect fresh cadavers. These cadavers are then used to begin new vials (Day 0).

<https://youtu.be/111Wks5wYCs>

**Movie S1. *E. muscae* Berkeley-infected CantonS fly undergoing end-of-life proboscis extension.** Video recorded through the eyepiece of a dissecting microscope on a Nexus 5x phone (Google). Capture and playback are in real time.

<https://youtu.be/IiqJcpfBAGQ>

**Movie S2. *E. muscae* Berkeley-infected CantonS fly undergoing end-of-life wing raising, viewed from the side.** Video was captured with a Nexus 5x phone (Google) and macro lens (Luxsure). Capture and playback are in real time.

<https://youtu.be/DdR-iSdYG6A>

**Movie S3. *E. muscae* Berkeley-infected CantonS fly undergoing end-of-life wing raising, viewed head-on.** Video was captured with a Nexus 5x phone (Google) and macro lens (Luxsure). Capture and playback are in real time.

<https://youtu.be/qDCZJmhWkbU>

**Movie S4. Animated time lapse of *E. muscae* Berkeley-infected CantonS cadavers undergoing spore production and ejection.** Sporulation time lapse in *E. muscae* Berkeley killed cadavers. Time listed at the top right corner of each frame is the time that has elapsed since the light-dark transition. One image was taken every minute for ~24 hours with three cadavers situated on a cotton plug at ambient temperature and humidity. Images are played back at 10 fps.

<https://youtu.be/T5Pi0JoEm0I>

**Movie S5. A primary conidium is ejected from a conidiophore formed in an *E. muscae* Berkeley-killed cadaver.** Arrowheads indicates conidium that launches and the vacant conidiophore that remains after launch. Video was captured at 54,000 frames per second (fps) at 5x magnification; frames are played back at 5 fps. Scale bar is 25  $\mu$ m.

<https://youtu.be/B3BHDwvaggz>

**Movie S6. A primary conidium lands on the lid of a polystyrene petri dish.** The conidium lands as one complete unit, supporting the fungal cannon mechanism of primary conidium ejection in *E. muscae*. Video was captured at 18,000 fps at 5x magnification; frames are played back at 5 fps. Scale bar is 25  $\mu$ m.

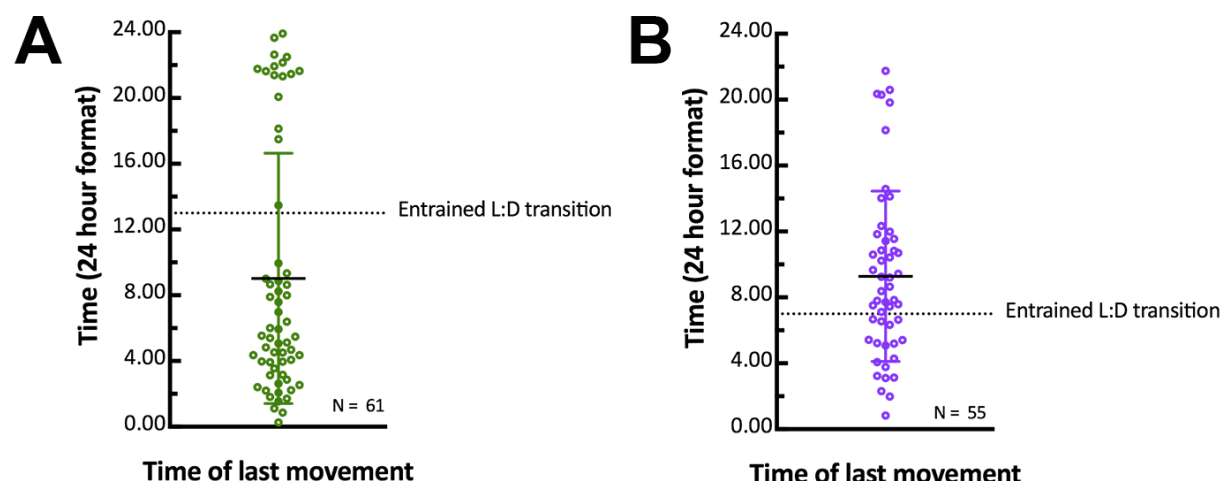

**Figure S5. *E. muscae* Berkeley-infected CantonS flies housed in constant darkness do not consistently die in a gated fashion.** Each circle represents the time of last movement observed for one cadaver as detected by the DAM. Flies were raised on the indicated 12:12 light:dark cycle then exposed to *E. muscae* Berkeley as per standardized protocol. Dotted line indicates the expected light-dark transition based on the entrained light cycle. A) Flies entrained on a 12:12 light:dark cycle with photophase beginning at 1 am and scotophase beginning at 1 pm. B) Flies entrained on a 12:12 light:dark cycle with photophase beginning at 7 pm and scotophase beginning at 7 am.

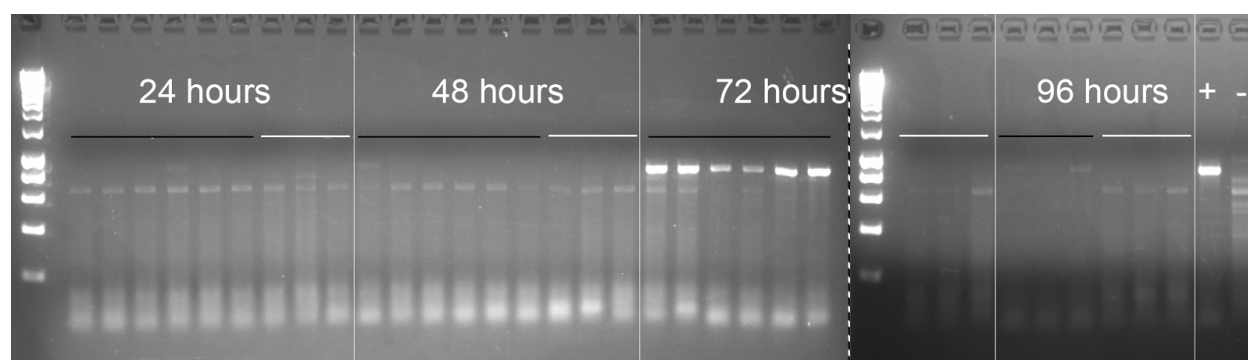

**Figure S6. Reverse-transcription PCR of *E. muscae* Berkeley ITS sequence in exposed and control flies.** All samples were run on the same gel with equal loading volumes; samples to the right of the dashed line were run on the lower half of the same gel containing samples to the left of dotted line (see methods for sample generation). DNA ladder (5  $\mu$ L Hyperladder 1 kb, Bioline) was run in the first lane of each gel half. Samples are shown in chronological order, with the time point indicated above the left-most sample. Black lines indicated exposed flies; white lines indicate unexposed flies. Exposed flies collected at 96 hours were cadavers that had died of *E. muscae* Berkeley infection. Plus (+) indicates positive control (*E. muscae* Berkeley *in vitro* RNA template); minus (-) indicates additional negative control (*D. melanogaster* RNA from earlier experiment, before the discovery and introduction of *E. muscae* Berkeley to the laboratory).

<https://youtu.be/GeTRUiBIW8s>

**Movie S7. Formation of primary conidia atop conidiophores.** The intersegmental membranes of a fresh *E. muscae* Berkeley-killed cadaver were imaged at 20x magnification every minute for 222 minutes beginning 4 hours and 10 minutes after sunset. The time lapse is played back at 10 fps. Scale bar is 50  $\mu$ m.

<https://youtu.be/1vrXbDWHQCw>

**Movie S8. Formation of secondary conidia from off-target primaries.** The wing of an *E. muscae* Berkeley-killed cadaver was imaged at 20x magnification every minute for 361 minutes beginning 10 hours and 30 minutes after the light-dark transition. The time lapse is played back at 10 fps. Scale bar is 100  $\mu$ m.

**Table S1. GO term enrichments of host gene groups as given in Figure 4C.** Panther GO-term analysis (complete biological process) for genes in Groups i-vi (Figure 4C).

➤ See file Table\_S1.pdf



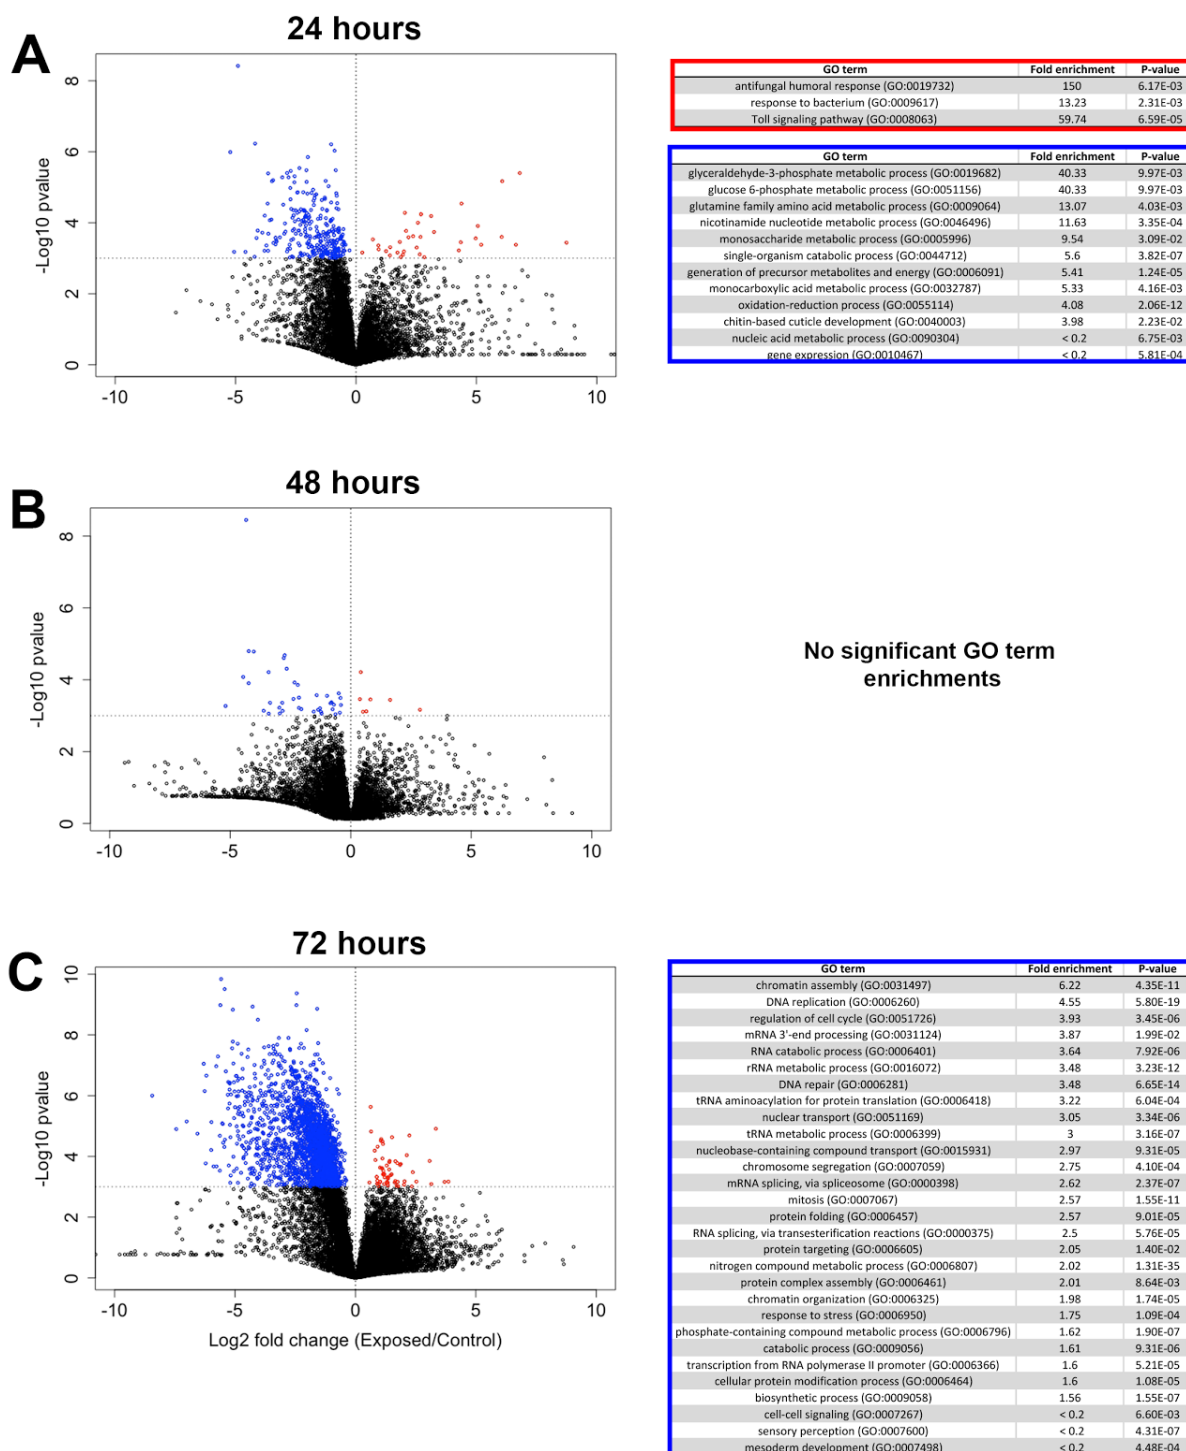

**Figure S7. Genes exhibiting differential expression between flies after mock exposure or exposure to *E. muscae* at 24, 48 or 72 hours.** A) Left: Volcano plot for all genes at 24 hours. P-value is determined by ANOVA grouping control vs. exposed samples. Genes with p-value < 0.001 are shown in color. Right: Panther GO-term analysis (complete biological process) of genes overexpressed in exposed animals (red)

1046 or control animals (blue). B) Left: Volcano plot for all genes at 48 hours. P-value is determined by ANOVA  
 1047 grouping control vs. exposed samples. Genes with p-value under 0.001 are shown in color. Right: No  
 1048 significant GO term enrichments were found for differentially-expressed genes. C) Left: Volcano plot for  
 1049 all genes at 72 hours. P-value is determined by ANOVA grouping control vs. exposed samples. Genes with  
 1050 p-value under 0.001 are shown in color. Right: Panther GO-term analysis (complete biological process) of  
 1051 genes overexpressed in control animals (blue). There are no significant GO term enrichments for set of  
 1052 genes overexpressed in exposed samples.

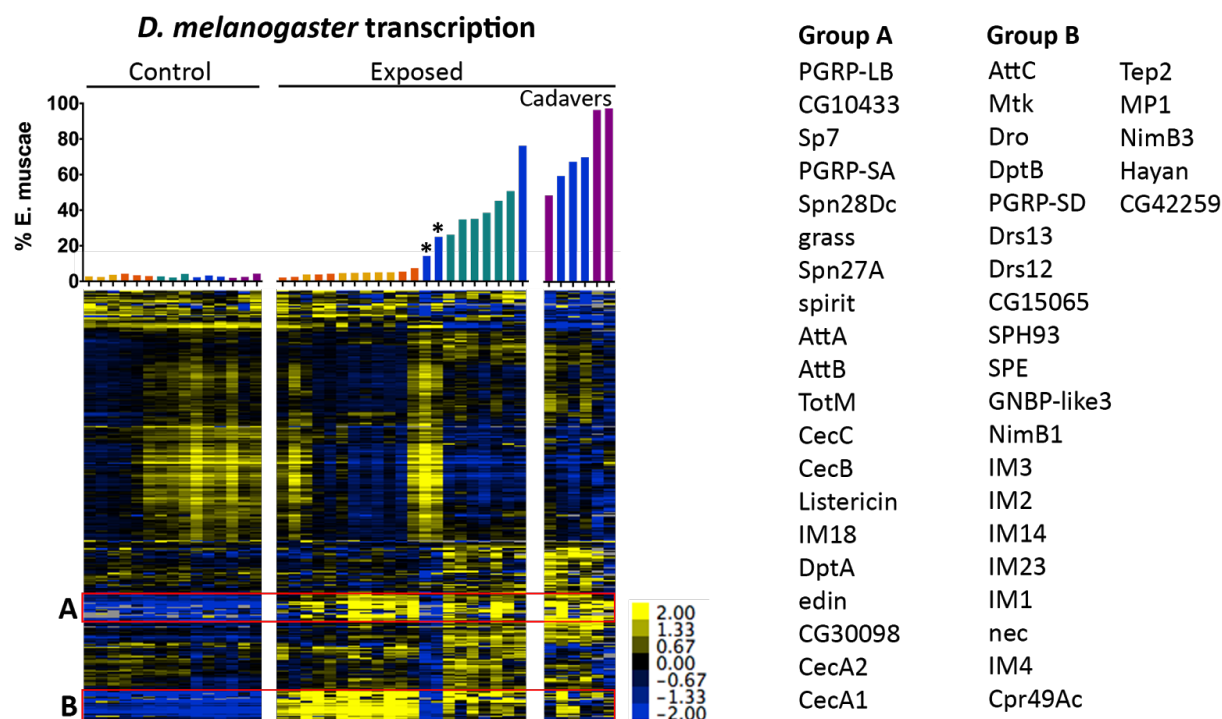

**Figure S8. Expression of immune genes over the course of infection of *D. melanogaster* by *E. muscae* Berkeley.** Complete linkage hierarchical gene clustering by gene was performed in Gene Cluster 3.0 on all genes annotated with defense response (GO 0006952) after filtering out across all genes that are expressed at least at two TPM in at least three out of 42 samples (10,875 transcripts total), then log transforming and centering on the mean value for each transcript. Samples are ordered by percentage of *E. muscae* Berkeley reads as a fraction of the total reads aligned (above). The scale bar for the heatmap is given to the right of the plot. Two 96 hour exposed samples that show an aberrant immune response compared to all other exposed samples are indicated by asterisks.

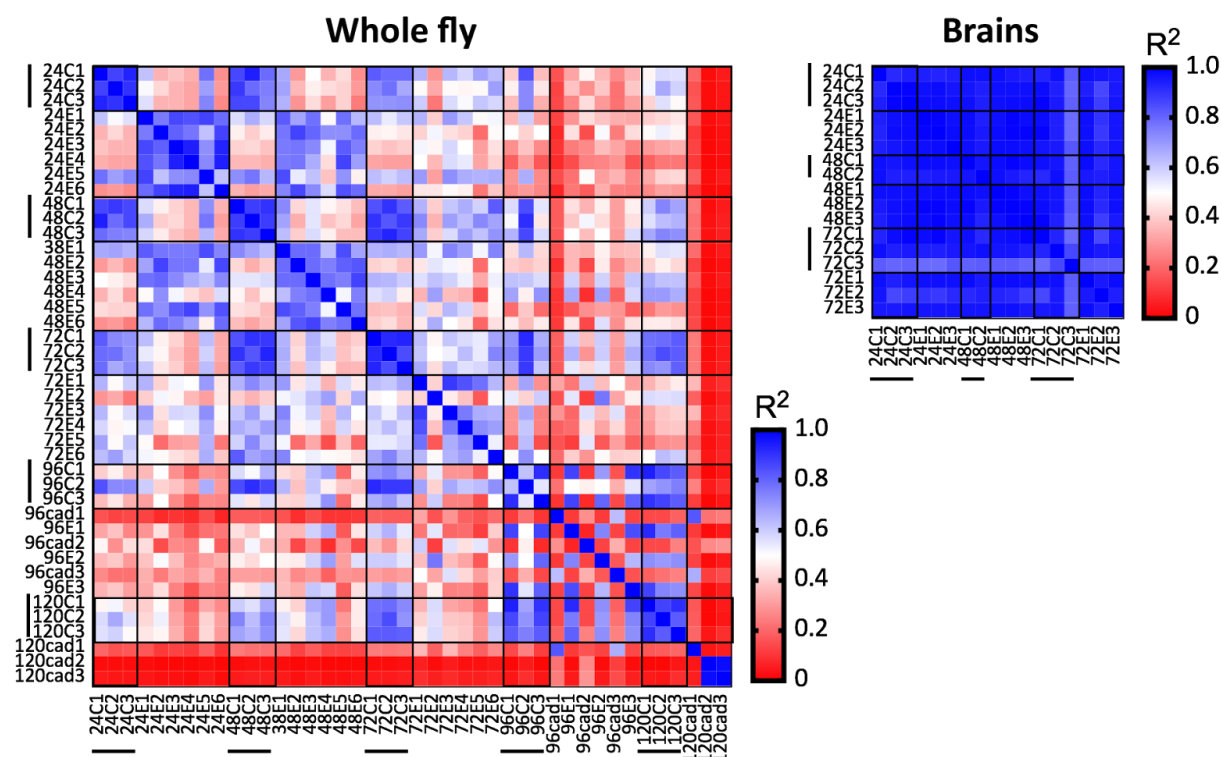

**Figure S9. Host gene expression in the brain is stable over the first 72 hours of *E. muscae Berkeley* infection.** Right) All pairwise linear correlations between samples from *E. muscae Berkeley*-infected whole fly RNAseq time course. Left) All pairwise linear correlations between samples from *E. muscae Berkeley*-infected dissected brain pilot RNAseq time course. Samples are named in the following format: HourTypeReplicate, with “C” indicating controls, “E” indicating exposed flies living at the time sampled and “cad” indicates that the fly had been killed by *E. muscae Berkeley* before sampling. For example, “24C1” indicates a the first replicate control sample (uninfected fly) taken at 24 hours after mock exposure. Black rectangles outline rows and columns containing correlation values for control samples. Control samples are denoted on each axis with a black bar.

# References

- 1072
- 1073 Hughes DP, Andersen SB, Hywel-Jones NL, Himaman W, Billen J, Boomsma JJ. Behavioral
- 1074 mechanisms and morphological symptoms of zombie ants dying from fungal infection. BMC Ecol.
- 1075 2011;11: 13.
- 1076 Vyas A, Kim S-K, Giacomini N, Boothroyd JC, Sapolsky RM. Behavioral changes induced by
- 1077 Toxoplasma infection of rodents are highly specific to aversion of cat odors. Proc Natl Acad Sci.
- 1078 2007;104: 6442–6447.
- 1079 Spatafora JW, Chang Y, Benny GL, Lazarus K, Smith ME, Berbee ML, et al. A phylum-level
- 1080 phylogenetic classification of zygomycete fungi based on genome-scale data. Mycologia. 2016;108:
- 1081 1028–1046.
- 1082 Cohn F. Empusa muscae und die krankheit der Stubenfliegen. Ein Beitrag zur Lehre von den durch
- 1083 parasitische Pilze charakterisierten Epidemien. Nova acta Academiae Caesareae Leopoldino-Carolinae
- 1084 Germanicae Naturae Curiosorum. 1855;25: 299–360.
- 1085 Keller S. Entomophthora muscae als Artenkomplex. Mitteilungen der Schweizerischen Entomologischen
- 1086 Gesellschaft. agris.fao.org; 1984;57: 131–132.
- 1087 MacLeod DM, Müller-Kögler E, Wilding N. Entomophthora species with E. muscae-like conidia.
- 1088 Mycologia. JSTOR; 1976;68: 1–29.
- 1089 Roy HE, Steinkraus DC, Eilenberg J, Hajek AE, Pell JK. Bizarre Interactions and Endgames:
- 1090 Entomopathogenic Fungi and Their Arthropod Hosts. Annu Rev Entomol. 2006;51: 331–357.
- 1091 Balazy S. On Rhizoids of Entomophthora-muscae (Cohn) Fresenius (Entomophthorales,
- 1092 Entomophthoraceae). Mycotaxon. 1984;19: 397–407.
- 1093 Krasnoff SB, Watson DW, Gibson DM, Kwan EC. Behavioral effects of the entomopathogenic fungus,
- 1094 Entomophthora muscae on its host Musca domestica: Postural changes in dying hosts and gated pattern of
- 1095 mortality. J Insect Physiol. Elsevier; 1995;41: 895–903.
- 1096 Brobyn PJ, Wilding N. Invasive and developmental processes of Entomophthora muscae infecting
- 1097 houseflies (Musca domestica). Trans Br Mycol Soc. Elsevier; 1983;80: 1–8.



- 1098 1. Mullens BA, Rodriguez JL. Dynamics of *Entomophthora muscae* (Entomophthorales:  
1099 Entomophthoraceae) Conidial Discharge from *Musca domestica* (Diptera: Muscidae) Cadavers. Environ  
1100 Entomol. [ee.oxfordjournals.org](http://ee.oxfordjournals.org); 1985;14: 317–322.
- 1101 2. Mullens, B A Rodriguez, J L Meyer, J A. An Epizootiological Study of *Entomophthora muscae* in  
1102 Muscoid Fly Populations on Southern California Poultry Facilities, with Emphasis on *Musca domestica*.  
1103 Hilgardia. 1987;55.
- 1104 3. Charnley AK. Physiological aspects of destructive pathogenesis in insects by fungi: a speculative review.  
1105 In: J M Anderson Adm Rayner, editor. Invertebrate-microbial interactions: Joint symposium of the British  
1106 Mycological Society and the British Ecological Society held at the University of Exeter 1982. 1984. pp.  
1107 229–270.
- 1108 4. Watson DW, Petersen JJ. Sexual Activity of Male *Musca domestica* (Diptera: Muscidae) Infected with  
1109 *Entomophthora muscae* (Entomophthoraceae: Entomophthorales). Biol Control. Elsevier; 1993;3: 22–26.
- 1110 5. Steinkraus DC, Kramer JP. Susceptibility of sixteen species of Diptera to the fungal pathogen  
1111 *Entomophthora muscae* (Zygomycetes: Entomophthoraceae). Mycopathologia. 1987;100: 55–63.
- 1112 6. Kramer JP, Steinkraus DC. Culture of *Entomophthora muscae* in vivo and its infectivity for six species of  
1113 muscoid flies. Mycopathologia. Springer Netherlands; 1981;76: 139–143.
- 1114 7. Keller S. Arthropod-pathogenic Entomophthorales: Biology, Ecology, Identification. 2007.
- 1115 8. Elya C, Zhang V, Ludington WB, Eisen MB. Stable Host Gene Expression in the Gut of Adult  
1116 *Drosophila melanogaster* with Different Bacterial Mono-Associations. PLoS One. Public Library of  
1117 Science; 2016;11: e0167357.
- 1118 9. Turian G, Wuest J. MYCOSES CAUSED BY ENTOMOPHTHORACEAE AFFECTING  
1119 POPULATIONS OF ANTS AND DROSOPHILA. Mitteilungen der Schweizerischen Entomologischen  
1120 Gesellschaft. 1969;42: 197–201.
- 1121 10. Goldstein B. An Empusa Disease of *Drosophila*. Mycologia. Mycological Society of America; 1927;19:  
1122 97–109.
- 1123 11. Keller S. The genus *Entomophthora* (Zygomycetes, Entomophthorales) with a description of five new  
1124 species. SYDOWIA-HORN-. VERLAG FERDINAND BERGER; 2002;54: 157–197.

11252. Liu H, Beckenbach AT. Evolution of the mitochondrial cytochrome oxidase II gene among 10 orders of  
1126 insects. *Mol Phylogenet Evol.* 1992;1: 41–52.
112723. Hajek AE, Papierok B, Eilenberg J. Chapter IX - Methods for study of the Entomophthorales. In: Lacey  
1128 LA, editor. *Manual of Techniques in Invertebrate Pathology* (Second Edition). San Diego: Academic  
1129 Press; 2012. pp. 285–316.
11304. Kalsbeek V, Pell JK, Steenberg T. Sporulation by *Entomophthora schizophorae* (Zygomycetes:  
1131 Entomophthorales) from housefly cadavers and the persistence of primary conidia at constant  
1132 temperatures and relative humidities. *J Invertebr Pathol.* Elsevier; 2001;77: 149–157.
11335. Yafetto L, Carroll L, Cui Y, Davis DJ, Fischer MWF, Henterly AC, et al. The fastest flights in nature:  
1134 high-speed spore discharge mechanisms among fungi. *PLoS One.* 2008;3: e3237.
11356. Humber RA. An alternative view of certain taxonomic criteria used in the Entomophthorales  
1136 (Zygomycetes) [Fungi, insect pathogens]. *Mycotaxon.* apr-jun1981;13. Available:  
1137 <http://agris.fao.org/agris-search/search.do?recordID=US8112089>
11387. Becher PG, Jensen RE, Natsopoulou ME, Verschut V, De Fine Licht HH. Infection of *Drosophila suzukii*  
1139 with the obligate insect-pathogenic fungus *Entomophthora muscae*. *J Pest Sci.* Springer Berlin  
1140 Heidelberg; 2017; 1–7.
11418. Keller S, Kalsbeek V, Eilenberg J. Redescription of *Entomophthora muscae* (Cohn) Fresenius. *Sydowia.*  
1142 1999;51: 197–209.
11439. Boomsma JJ, Jensen AB, Meyling NV, Eilenberg J. Evolutionary interaction networks of insect  
1144 pathogenic fungi. *Annu Rev Entomol.* 2014;59: 467–485.
11450. De Fine Licht HH, Jensen AB, Eilenberg J. Comparative transcriptomics reveal host-specific nucleotide  
1146 variation in entomophthoralean fungi. *Mol Ecol.* 2017;26: 2092–2110.
11471. Butt TM, Hajek AE, Humber RA. Gypsy Moth Immune Defenses in Response to Hyphal Bodies and  
1148 Natural Protoplasts of Entomophthoralean Fungi. *J Invertebr Pathol.* 1996;68: 278–285.
11492. Beauvais A, Latge J-P, Vey A. The Role of Surface Components of the Entomopathogenic Fungus  
1150 *Entomophaga aulicae* in the Cellular Immune Response of *Galleria mellonella* (Lepidoptera). *J Gen*  
1151 *Microbiol.* 1989;135: 489–498.

11523. Valanne S, Wang J-H, Rämet M. The Drosophila Toll signaling pathway. J Immunol. 2011;186: 649–  
1153 656.
11544. Levitin A, Whiteway M. Drosophila innate immunity and response to fungal infections. Cell Microbiol.  
1155 2008;10: 1021–1026.
11565. Fredericksen MA, Zhang Y, Hazen ML, Loreto RG, Mangold CA, Chen DZ, et al. Three-dimensional  
1157 visualization and a deep-learning model reveal complex fungal parasite networks in behaviorally  
1158 manipulated ants. Proc Natl Acad Sci U S A. 2017; doi:10.1073/pnas.1711673114
11596. Humber RA. The systematics of the genus Strongwellsea (Zygomycetes: Entomophthorales). Mycologia.  
1160 1976;68: 1042–1060.
11637. Grabherr MG, Haas BJ, Yassour M, Levin JZ, Thompson DA, Amit I, et al. Full-length transcriptome  
1162 assembly from RNA-Seq data without a reference genome. Nat Biotechnol. 2011;29: 644–652.
11638. Bray NL, Pimentel H, Melsted P, Pachter L. Near-optimal probabilistic RNA-seq quantification. Nat  
1164 Biotechnol. 2016;34: 525–527.
11659. Mi H, Poudel S, Muruganujan A, Casagrande JT, Thomas PD. PANTHER version 10: expanded protein  
1166 families and functions, and analysis tools. Nucleic Acids Res. 2016;44: D336–42.
11670. Ruzin SE. Plant Microtechnique and Microscopy. Oxford University Press; 1999.
